# Supplementary material
Source: PubMed Central journal article supplement (PMC8847621)
Supplement: 40121_2021_545_MOESM1_ESM.pdf [file 40121_2021_545_MOESM1_ESM.pdf]

# **Efficacy and Safety of Immunomodulators in Patients with COVID-19: A Systematic Review and Network Meta-analysis of Randomized Controlled Trials**

Thundon Ngamprasertchai\*, MD, **Rattagan Kajeekul\*\***, MD, Chaisith Sivakorn\*, MD, Narisa Ruenroegnboon\*\*\*, Pharm.D., Viravarn Luvira\*, MD, PhD, Tanaya Siripoon\*, MD, Nantasit Luangasanatip, PhD\*\*\*\*

\* Department of Clinical Tropical Medicine, Faculty of Tropical Medicine, Mahidol University, Bangkok, Thailand

Thundon Ngamprasertchai Email: [thundon.ngm@mahidol.ac.th](mailto:thundon.ngm@mahidol.ac.th), Chaisith Sivakorn Email: [chaisith.siv@mahidol.edu](mailto:chaisith.siv@mahidol.edu), Viravarn Luvira Email: [viravarn.luv@mahidol.ac.th](mailto:viravarn.luv@mahidol.ac.th), Tanaya Siripoon Email: [tanaya.sir@mahidol.ac.th](mailto:tanaya.sir@mahidol.ac.th)

\*\*Email: [rattagan\\_k@yahoo.com](mailto:rattagan_k@yahoo.com), Department of Medicine, Maharat Nakhon Ratchasima Hospital, Nakhon Ratchasima, Thailand

\*\*\*Email: [polladew@gmail.com](mailto:polladew@gmail.com), Department of Pharmaceutics (Clinical Pharmacy), Faculty of Pharmacy, Slipakorn University, Nakhon Pathom, Thailand

\*\*\*\*Email: [nantasit\\_l@yahoo.com](mailto:nantasit_l@yahoo.com), Mahidol Oxford Tropical Medicine Research Unit, Faculty of Tropical Medicine, Mahidol University, Bangkok, Thailand

## **Corresponding Author**

Rattagan Kajeekul, MD

Infectious Disease Physician

Department of Medicine, Maharat Nakhon Ratchasima Hospital

49 Changphuak Rd, Tambon Nai Mueang Nakhon Ratchasima District,

Nakhon Ratchasima 30000, Thailand

Phone No: +66(0) 85-088-7736

Email: [rattagan\\_k@yahoo.com](mailto:rattagan_k@yahoo.com)

## Table of Contents

|                                                                  |           |
|------------------------------------------------------------------|-----------|
| <b>1. Search strategies</b> .....                                | <b>1</b>  |
| 1.1 MEDLINE .....                                                | 1         |
| 1.2 Scopus .....                                                 | 1         |
| Table S1 .....                                                   | 1         |
| Table S2 .....                                                   | 3         |
| <b>2. Transitivity assessment subgroup by severity</b> .....     | <b>5</b>  |
| Figure S1 .....                                                  | 5         |
| Figure S2 .....                                                  | 6         |
| Figure S3 .....                                                  | 7         |
| <b>3. Risk of bias assessment</b> .....                          | <b>8</b>  |
| Figure S4 .....                                                  | 8         |
| <b>4. Direct meta-analysis immunomodulators vs placebo</b> ..... | <b>10</b> |
| a. corticosteroids .....                                         | 10        |
| <b>4.1.1 mortality rate outcome</b> .....                        | <b>10</b> |
| Figure S5 .....                                                  | 10        |
| Figure S6 .....                                                  | 11        |
| Figure S7 .....                                                  | 12        |
| <b>4.1.2 incidence of IMV outcome</b> .....                      | <b>13</b> |
| Figure S8 .....                                                  | 13        |
| Figure S9 .....                                                  | 14        |
| Figure S10 .....                                                 | 15        |
| <b>4.1.3 superimposed infection</b> .....                        | <b>16</b> |
| Figure S11 .....                                                 | 16        |
| Figure S12 .....                                                 | 17        |
| Figure S13 .....                                                 | 18        |
| b. IL antagonists .....                                          | 19        |
| <b>4.2.1 mortality rate outcome</b> .....                        | <b>19</b> |
| Figure S14 .....                                                 | 19        |
| Figure S15 .....                                                 | 20        |
| Figure S16 .....                                                 | 21        |
| <b>4.2.2 incidence of IMV</b> .....                              | <b>22</b> |
| Figure S17 .....                                                 | 22        |
| Figure S18 .....                                                 | 23        |
| Figure S19 .....                                                 | 24        |
| <b>4.2.3 superimposed infection</b> .....                        | <b>25</b> |
| Figure S20 .....                                                 | 25        |

|                                                                                      |           |
|--------------------------------------------------------------------------------------|-----------|
| Figure S21.....                                                                      | 26        |
| Figure S22.....                                                                      | 27        |
| c. JAK inhibitors .....                                                              | 28        |
| <b>4.3.1 mortality rate</b> .....                                                    | 28        |
| Figure S23.....                                                                      | 28        |
| Figure S24.....                                                                      | 29        |
| <b>4.3.2 incidence of IMV (not performed due to insufficient for poolings)</b> ..... | 30        |
| <b>4.3.3 superimposed infection</b> .....                                            | 30        |
| Figure S25.....                                                                      | 30        |
| Figure S26.....                                                                      | 31        |
| <b>5. Network map of eligible comparison for efficacy and adverse events .....</b>   | <b>32</b> |
| Figure S27A .....                                                                    | 32        |
| Figure S27B .....                                                                    | 33        |
| Figure S27C .....                                                                    | 34        |
| <b>6. Network meta-analysis outcome .....</b>                                        | <b>35</b> |
| Table S3.....                                                                        | 35        |
| Table S4.....                                                                        | 37        |
| Table S5.....                                                                        | 39        |
| Table S6.....                                                                        | 40        |
| Table S7.....                                                                        | 41        |
| Table S8.....                                                                        | 42        |
| Figure S28.....                                                                      | 43        |
| Figure S29:.....                                                                     | 44        |
| Figure S30:.....                                                                     | 45        |
| <b>7. Evaluation of consistency .....</b>                                            | <b>46</b> |
| Figure S31.....                                                                      | 46        |
| Figure S32.....                                                                      | 47        |
| Figure S33.....                                                                      | 48        |
| Figure S34.....                                                                      | 49        |
| Figure S35.....                                                                      | 50        |
| Figure S36.....                                                                      | 51        |
| Figure S37.....                                                                      | 52        |

## 1. Search strategies

### 1.1 MEDLINE

((((((((((corticoid\*) OR (glucocorticoid\*)) OR (steroid\*)) OR (corticosteroid\*)) OR (cortison\*) OR (prednison\*) OR (prednisolon\*) OR (dexamethason\*) OR ((methylprednisolone) OR (methylpredni\*)) OR ((((((siltuximab) OR (sylvant)) OR (CNTO- 328)) OR ((sarilumab) OR (kevzara))) OR (((((tocilizumab) OR (R-1569)) OR (actemra)) OR (atlizumab)) OR (RoActemra))) AND (((Anti-IL-6 receptor monoclonal antibod\*) OR (IL-6 blockade)) OR (IL-6 receptor antagonist)))))) OR (((Janus kinase inhibitor) OR (JAK-inhibitor)) OR (Janas kinase antagonists)) AND (((Baricitinib) OR (olumiant)) OR (LY3009104)))) AND (((((((((((covid 19[MeSH Terms]) OR (covid-19[MeSH Terms]) OR (covid19)) OR (covid 19)) OR (covid-19)) OR (Severe acute respiratory syndrome coronavirus 2)) OR (SARS-CoV-2)) OR (2019 novel coronavirus)) OR (coronavirus disease 2019)) OR (COVID2019))

### 1.2 Scopus

**Table S1. PICO searching: Scopus database**

| Search              | Domain             | Query                                                           | Results        |
|---------------------|--------------------|-----------------------------------------------------------------|----------------|
| <b>Population</b>   |                    |                                                                 |                |
| #1                  | Covid-19           | TITLE-ABS-KEY (covid19)                                         |                |
| #2                  |                    | TITLE-ABS-KEY (covid-19)                                        |                |
| #3                  |                    | TITLE-ABS-KEY (Severe acute respiratory syndrome coronavirus 2) |                |
| #4                  |                    | TITLE-ABS-KEY (2019-nCoV)                                       |                |
| #5                  |                    | TITLE-ABS-KEY (SARS-CoV-2)                                      |                |
| #6                  |                    | TITLE-ABS-KEY (2019 novel coronavirus)                          |                |
| #7                  |                    | TITLE-ABS-KEY (coronavirus disease 2019)                        |                |
| #8                  |                    | <b>#1 OR #2 OR #3 OR #4 OR #5 OR #6 OR #7</b>                   |                |
| <b>Intervention</b> |                    |                                                                 |                |
| #9                  | Corticosteroid     | TITLE-ABS-KEY (glucocorticoid*)                                 |                |
| #10                 |                    | TITLE-ABS-KEY (steroid*)                                        |                |
| #11                 |                    | TITLE-ABS-KEY (corticosteroid*)                                 |                |
| #12                 |                    | TITLE-ABS-KEY (cortison*)                                       |                |
| #13                 |                    | TITLE-ABS-KEY (prednison*)                                      |                |
| #14                 |                    | TITLE-ABS-KEY (prednisolon*)                                    |                |
| #15                 |                    | TITLE-ABS-KEY (dexamethason*)                                   |                |
| #16                 |                    | <b>#9 OR #10 OR #11 OR #12 OR #13 OR #14 OR #15</b>             |                |
| #17                 | Methylprednisolone | TITLE-ABS-KEY (methylprednisolone)                              |                |
| #18                 |                    | TITLE-ABS-KEY (methylpredni*)                                   |                |
| #19                 |                    | <b>#17 OR #18</b>                                               |                |
| <b>Search</b>       | <b>Domain</b>      | <b>Query</b>                                                    | <b>Results</b> |

|     |                                        |                                                        |                               |  |
|-----|----------------------------------------|--------------------------------------------------------|-------------------------------|--|
| #20 | Interleukin inhibitor                  | TITLE-ABS-KEY (tocilizumab)                            |                               |  |
| #21 |                                        | TITLE-ABS-KEY (atlizumab)                              |                               |  |
| #22 |                                        | TITLE-ABS-KEY (R-1569)                                 |                               |  |
| #23 |                                        | TITLE-ABS-KEY (Actemra)                                |                               |  |
| #24 |                                        | TITLE-ABS-KEY (RoActemra)                              |                               |  |
| #25 |                                        | #20 OR #21 OR #22 OR #23 OR #24                        |                               |  |
| #26 |                                        | TITLE-ABS-KEY (sarilumab)                              |                               |  |
| #27 |                                        | TITLE-ABS-KEY (kevzara)                                |                               |  |
| #28 |                                        | #26 OR #27                                             |                               |  |
| #29 |                                        | TITLE-ABS-KEY (siltuximab)                             |                               |  |
| #30 |                                        | TITLE-ABS-KEY (sylvant)                                |                               |  |
| #31 |                                        | TITLE-ABS-KEY (CNTO- 328)                              |                               |  |
| #32 |                                        | #29 OR #30 OR #31                                      |                               |  |
| #33 |                                        | TITLE-ABS-KEY (Anti-IL-6 receptor monoclonal antibody) |                               |  |
| #34 |                                        | TITLE-ABS-KEY (IL-6 blockade)                          |                               |  |
| #35 |                                        | TITLE-ABS-KEY (IL-6 receptor antagonist)               |                               |  |
| #36 |                                        | #33 OR #34 OR #35                                      |                               |  |
| #37 |                                        |                                                        | TITLE-ABS-KEY (IL-1 blockade) |  |
| #38 |                                        | JAK inhibitors                                         | TITLE-ABS-KEY (Baricitinib)   |  |
| #39 |                                        |                                                        | TITLE-ABS-KEY (olumiant)      |  |
| #40 | TITLE-ABS-KEY (LY3009104)              |                                                        |                               |  |
| #41 | #38 OR #39 OR #40                      |                                                        |                               |  |
| #42 | TITLE-ABS-KEY (Janus kinase inhibitor) |                                                        |                               |  |
| #43 | TITLE-ABS-KEY (JAK-inhibitor)          |                                                        |                               |  |

|                                    |                  |                                               |  |
|------------------------------------|------------------|-----------------------------------------------|--|
| #44                                |                  | TITLE-ABS-KEY (Janus kinase antagonists)      |  |
| #45                                |                  | #42 OR #43 OR #44                             |  |
| #46                                |                  | #41 AND #45                                   |  |
| #47                                | All intervention | #16 OR #19 OR #25 OR #28 OR #32 OR #36 OR #46 |  |
| <b>Population AND intervention</b> |                  |                                               |  |
| #48                                |                  | #8 AND #47                                    |  |

**Table S2. Age group of participants in included studies.**

| No. | Study                           | Mean (SD) or median (range)                             |                |                                                    | Total        |
|-----|---------------------------------|---------------------------------------------------------|----------------|----------------------------------------------------|--------------|
|     |                                 | Intervention 1                                          | Intervention 2 | Control                                            |              |
| 1   | P. Horby (RECOVERY)             | 66.9 (15.4)                                             | NA             | 65.8 (15.8)                                        | -            |
| 2   | H. Jamaati                      | 54 (37-63), survivor<br>63 (55.5-72.5),<br>Non-survivor | NA             | 61.5 (54-62), survivor<br>67 (48-73), non-survivor | -            |
| 3   | B.M. Tomazini (CoDEX)           | 60.1 (15.8)                                             | NA             | 62.7 (13.1)                                        | -            |
| 4   | J. Vilar (Dexa-COVID19 network) | NA                                                      | NA             | NA                                                 | NA           |
| 5   | D.C. Angus (REMAP-CAP)          | 60.4 (11.6)                                             | 59.5 (12.7)    | 59.9 (14.6)                                        | -            |
| 6   | P.F. Dequin (CAPE COVID)        | 63.1 (51.5-70.8)                                        | NA             | 66.3 (53.5-72.7)                                   | -            |
| 7   | M.W Petersen (COVID STEROID)    | 59 (52-74)                                              | NA             | 62 (55-71)                                         | 61 (53-73)   |
| 8   | L. Corral-Gudino (Glucocovid)   | 73 (11)                                                 | NA             | 66 (12)                                            | 70 (12)      |
| 9   | M. Edalatifard                  | 55.8 (16.35)                                            | NA             | 61.7 (16.62)                                       | 58.5 (16.60) |
| 10  | C.M.P. Jeronimo (Metacovid)     | 54 (15)                                                 | NA             | 57 (15)                                            | 55 (15)      |
| 11  | X. Tang                         | 57 (49-67)                                              | NA             | 55 (38-65)                                         | 56 (39-66)   |
| 12  | P.W. Horby (RECOVERY)           | 63.3 (13.7)                                             | NA             | 63.9 (13.6)                                        | -            |
| 13  | O. Hermine (CORINUMO-TOCI)      | 64.0 (57.1-74.3)                                        | NA             | 63.3 (57.1-72.3)                                   | -            |
| 14  | O. Rosas (COVACTA)              | 60.9 (14.6)                                             | NA             | 60.6 (13.7)                                        | -            |

| No. | Study                           | Mean (SD) or median (range)            |                                        |                                         | Total            |
|-----|---------------------------------|----------------------------------------|----------------------------------------|-----------------------------------------|------------------|
|     |                                 | Intervention 1                         | Intervention 2                         | Control                                 |                  |
| 15  | C. Salama (EMPACTA)             | 56.0 (14.3)                            | NA                                     | 55.6 (14.4)                             | 55.9 (14.4)      |
| 16  | C. Salvarani (RCT-TCZ-COVID-19) | 61.5 (51.5-73.5)                       | NA                                     | 60.0 (54.0-69.0)                        | 60.0 (53.0-72.0) |
| 17  | A.S. Soin (CONVINTOC)           | 56 (47-63)                             | NA                                     | 54 (43-63)                              | -                |
| 18  | J.H. Stone (BACC Bay)           | 61.6 (46.4-69.7)                       | NA                                     | 56.5 (44.7-67.8)                        | 59.8 (45.3-69.4) |
| 19  | V.C. Veiga                      | 57.4 (15.7)                            | NA                                     | 57.5 (13.5)                             | -                |
| 20  | F.X. Lescure                    | 58.0 (48.0-67.0)<br>(Sarilumab 400 mg) | 58.0 (51.0-67.0)<br>(Sarilumab 200 mg) | 60.0 (53.0-69.5)                        | 59.0 (50.0-68.0) |
| 21  | X. Mariette CORIMONO-19 (ANA-1) | 67.0 (55.5-74.3)                       | NA                                     | 64.9 (59.5-78.3)                        | -                |
| 22  | Y. Cao                          | 63 (51-65)                             | NA                                     | 64 (59-71)                              | 63 (58-68)       |
| 23  | A.C. Kalil                      | 55.0 (15.4)                            | NA                                     | 55.8 (16.0)                             | 55.4 (15.7)      |
| 24  | P.O. Guimaraes (STOP-COIVD)     | 55 (14)                                | NA                                     | 57 (14)                                 | 56 (14)          |
| 25  | H. Zhao                         | 70 (45-89)<br>(favipiravir)            | 71 (48-77)<br>(tocilizumab)            | 75 (34-81)<br>(tocilizumab+favipiravir) | -                |
| 26  | A.C. Gordon (REMAP-CAP)         | 61.5 (12.5)<br>(tocilizumab)           | 63.4 (13.4)<br>(Sarilumab)             | 61.1 (12.8)                             | 61.4 (12.7)      |
| 27  | Rashad                          | 64 (55-72)                             | 60.5 (49.5-66.5)                       | NA                                      | -                |
| 28  | K. Ranjbar                      | 56.2 (17.5)                            | NA                                     | 61.3 (17.3)                             | -                |

## 2. Transitivity assessment subgroup by severity

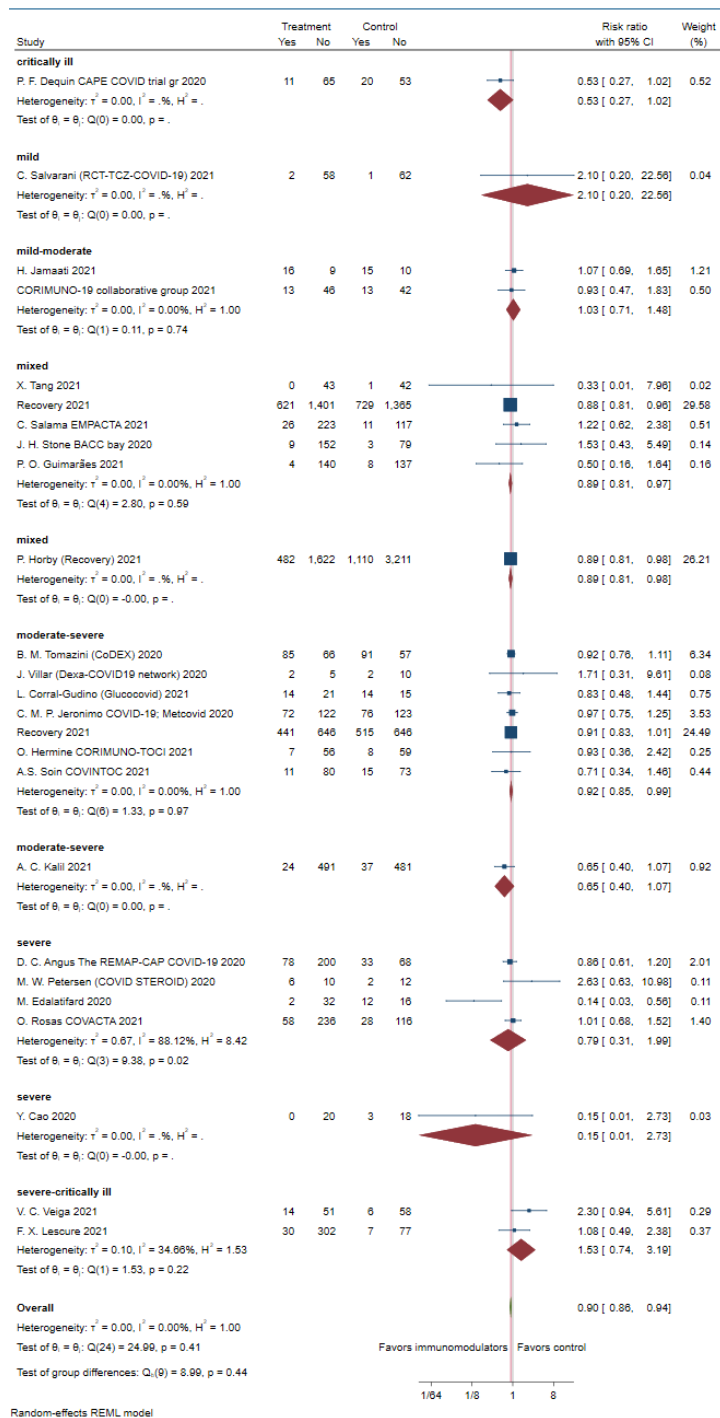

Figure S1. Transitivity assessment on mortality rate ( $I^2=0\%$ )



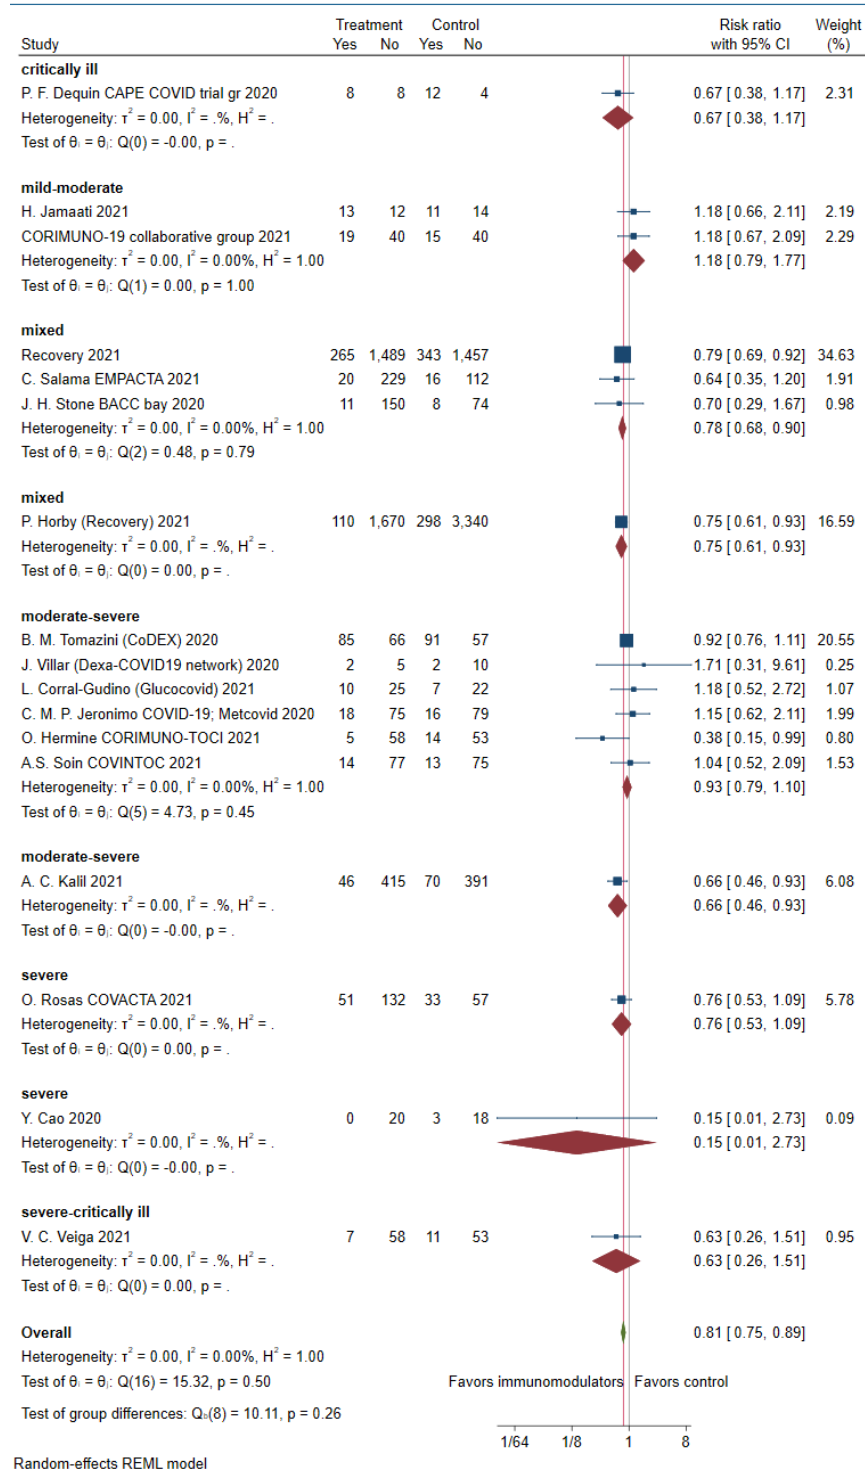

Figure S2. Transitivity assessment on incidence of IMV ( $I^2=0\%$ )

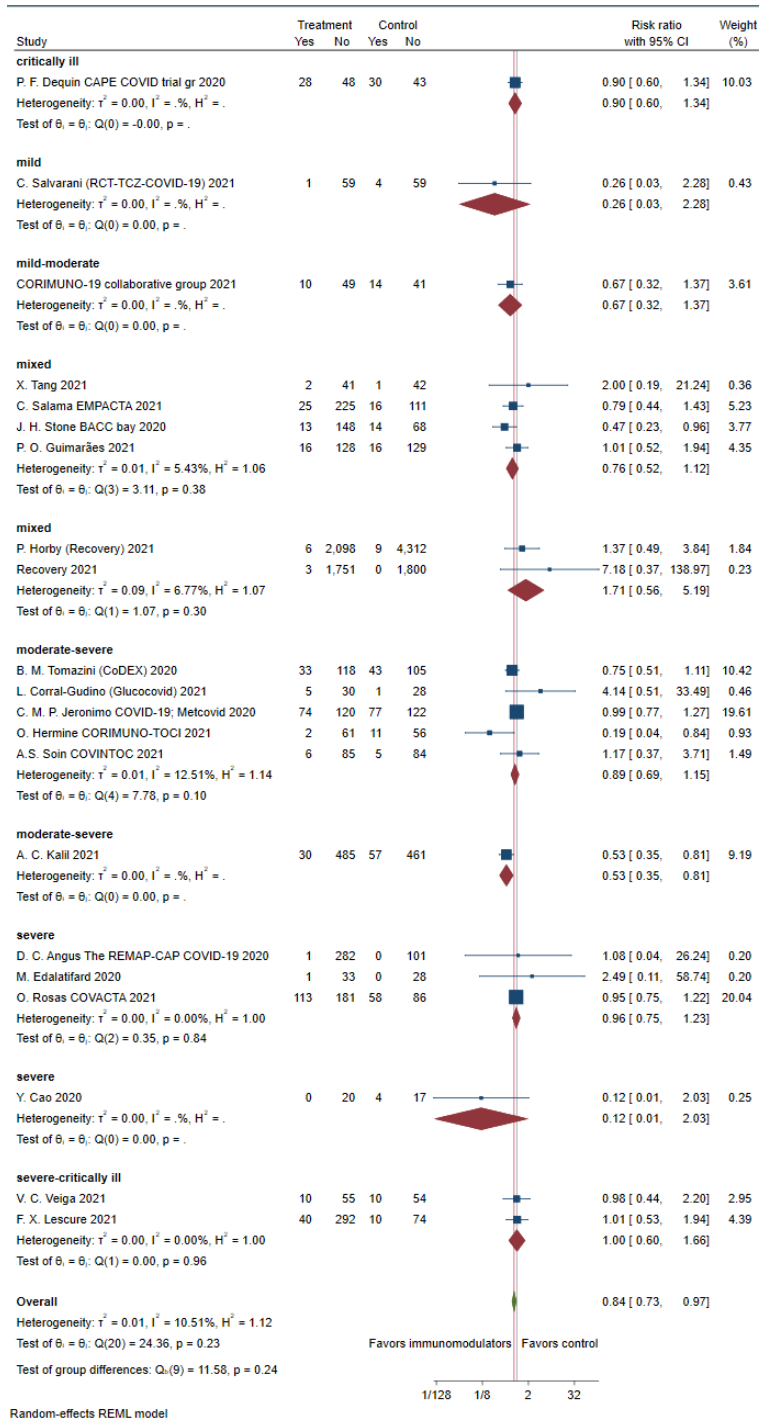

Figure S3. Transitivity assessment on incidence of superimposed infection ( $I^2=10.51\%$ )

### 3. Risk of bias assessment

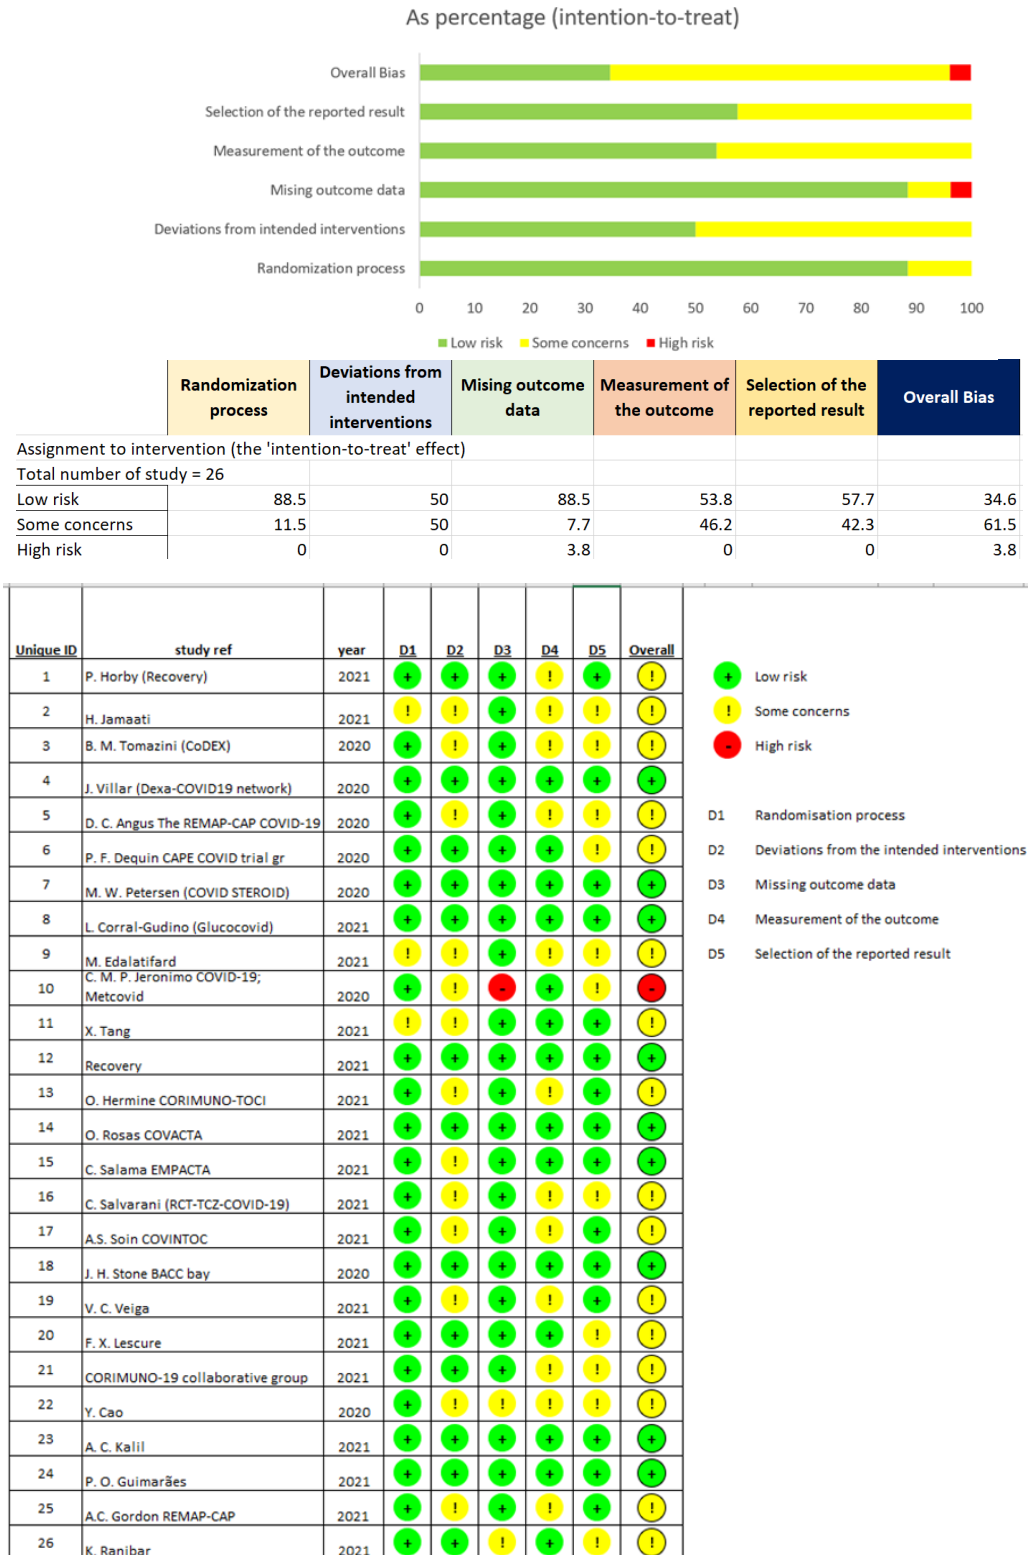

Figure S4. Cochrane Risk of Bias 2.0 Tool of included randomized controlled trials

**Description risk of bias**

For detail of rating criteria, see published article (Sterne JAC et al., BMJ. 2019). C. M. P. Jeronimo et al. had high RoB in missing outcome data; Y. Cao et al. had some concerns of bias in deviations from the intended interventions, missing outcome data, measurement of outcome and selection of the reported result. H. Jamaati et al. and M. Edalatifard et al. had some concerns of bias in randomisation process, deviations from the intended interventions, measurement of the outcome and selected of the reported results.

## 4. Direct meta-analysis immunomodulators vs placebo

### a. corticosteroids

#### 4.1.1 mortality rate outcome

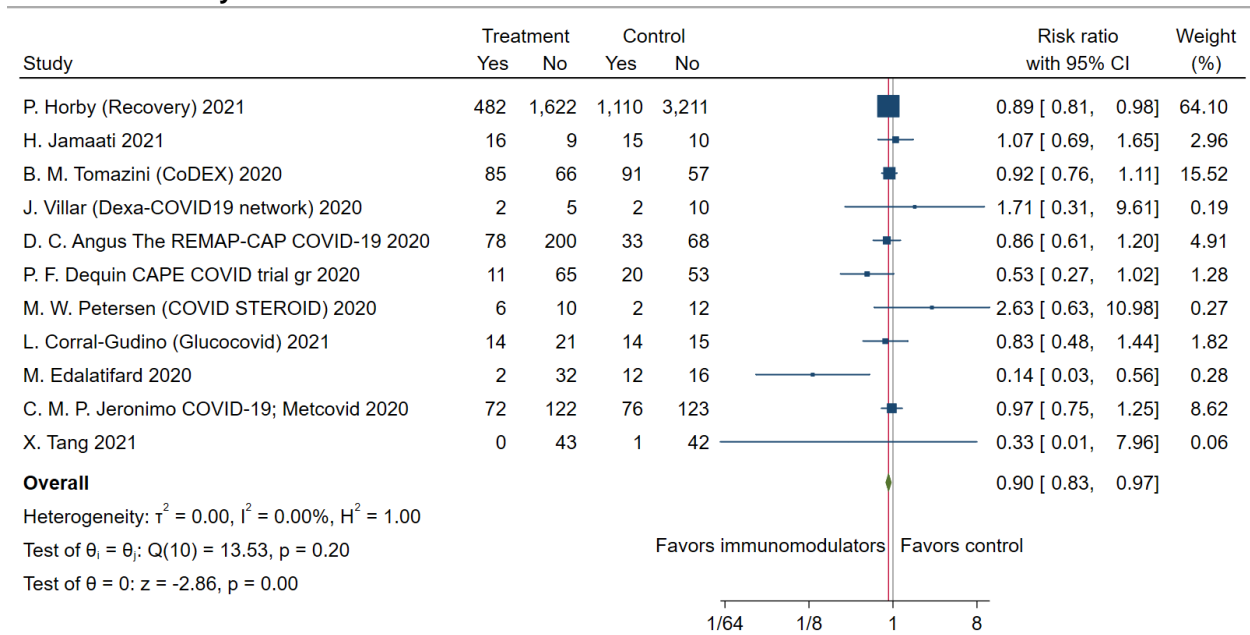

Random-effects REML model

Figure S5: Forest plot the effect of corticosteroid on mortality rate in direct meta-analysis

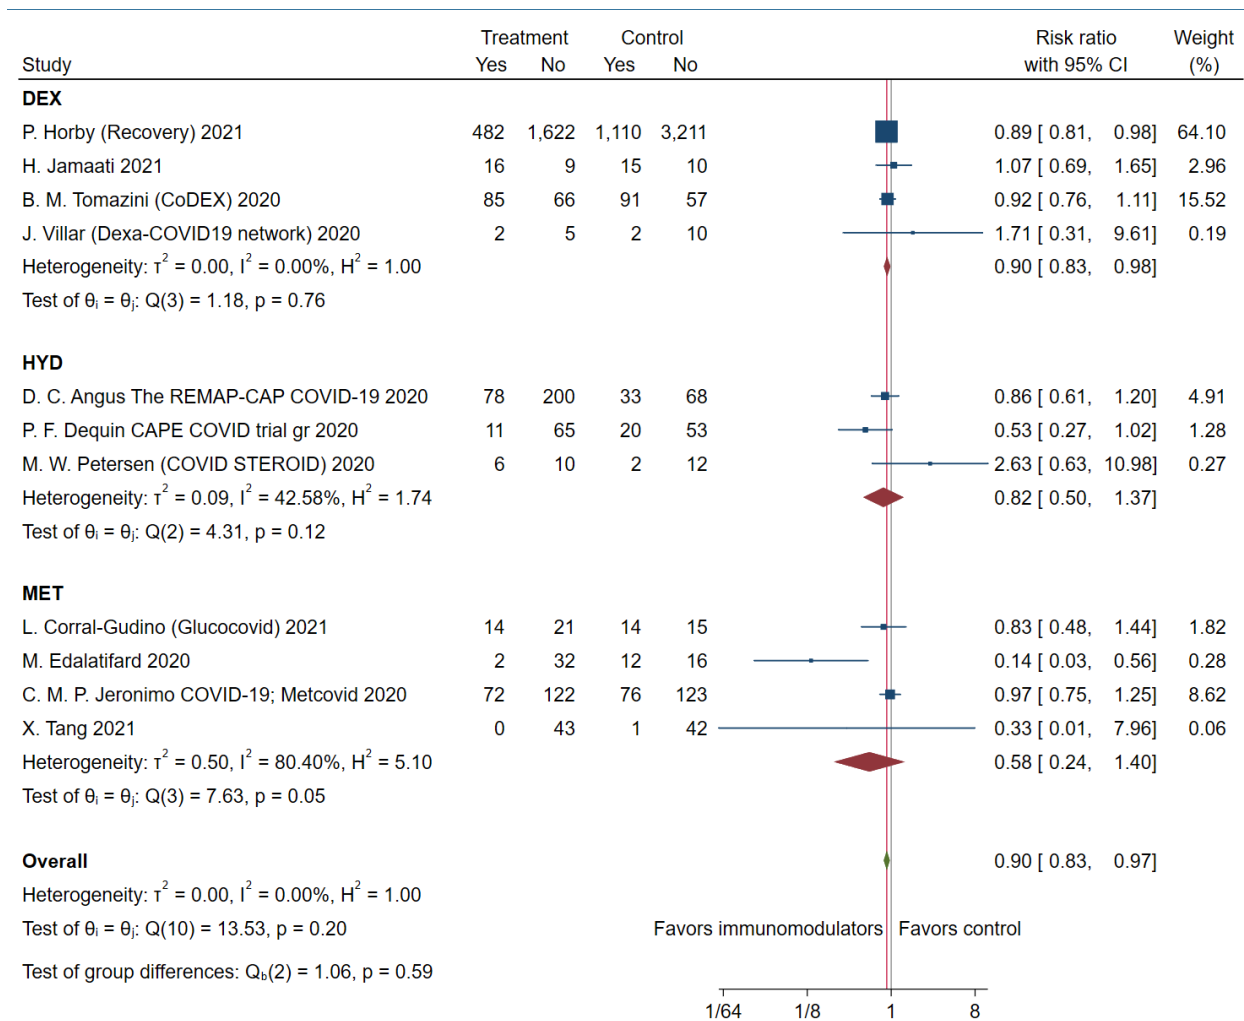

Random-effects REML model

Figure S6: Forest plot the effect of corticosteroid on mortality rate in direct meta-analysis subgroup by types of corticosteroid

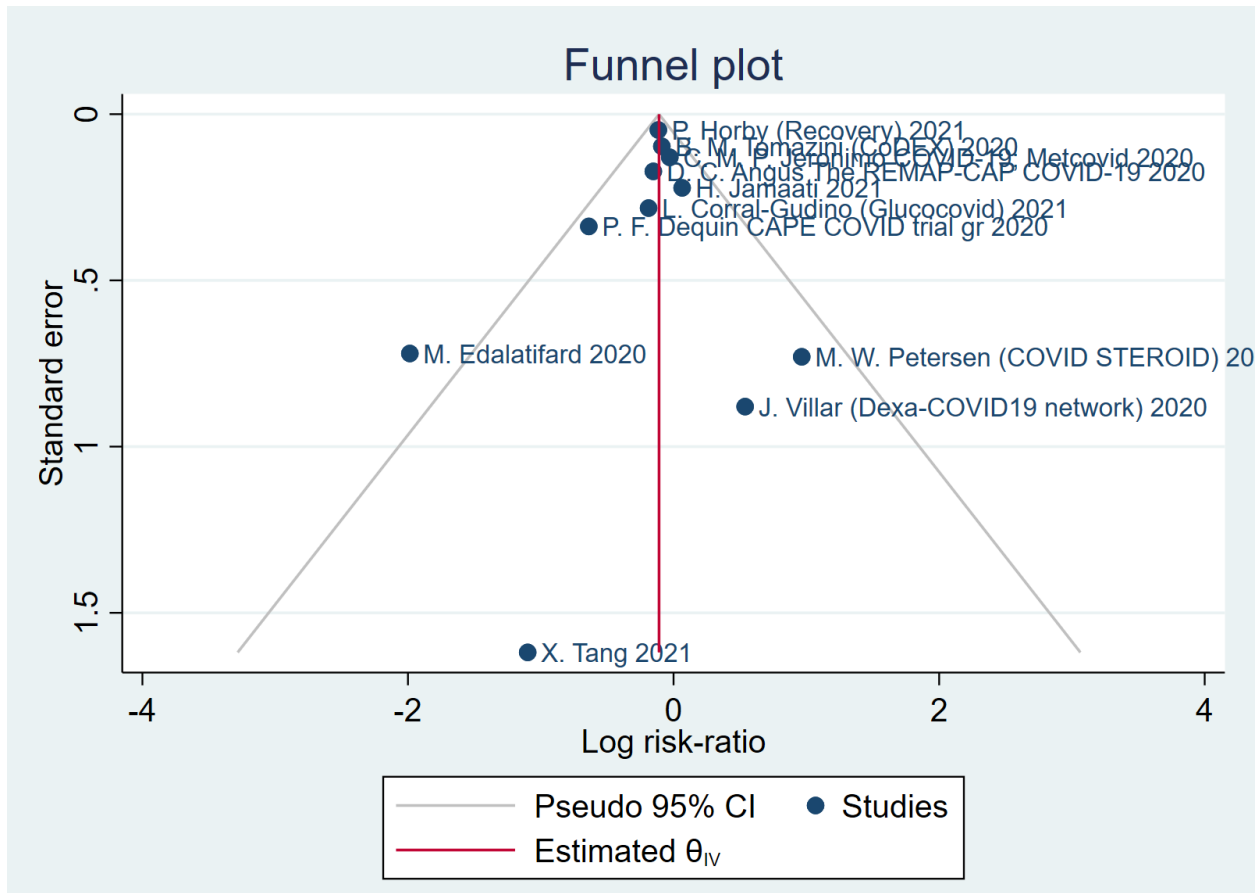

Figure S7: funnel plots the effect of corticosteroid on mortality rate (egger's test;  $p=0.504$ )

### 4.1.2 incidence of IMV outcome

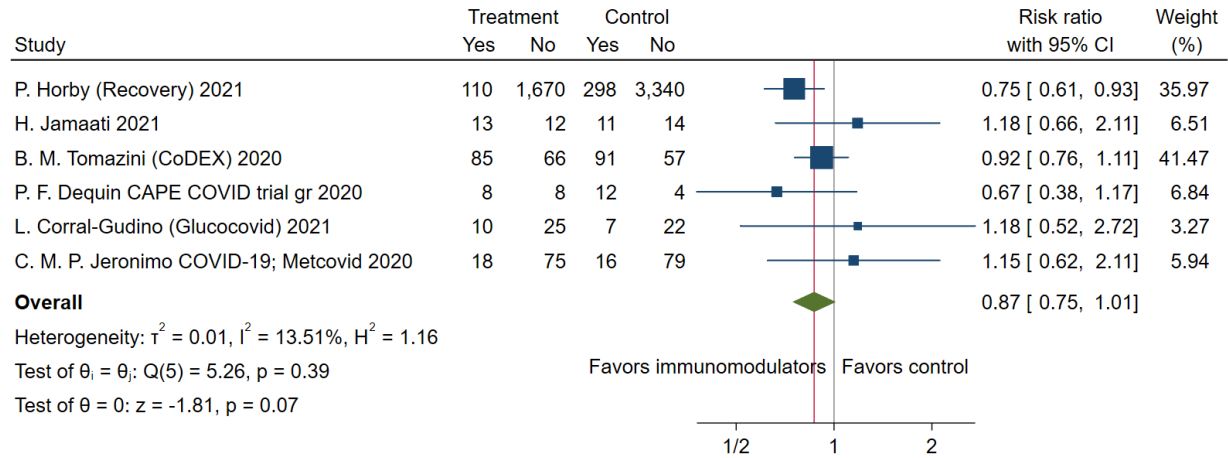

Random-effects REML model

Figure S8: Forest plot the effect of corticosteroid on incidence of IMV in direct meta-analysis



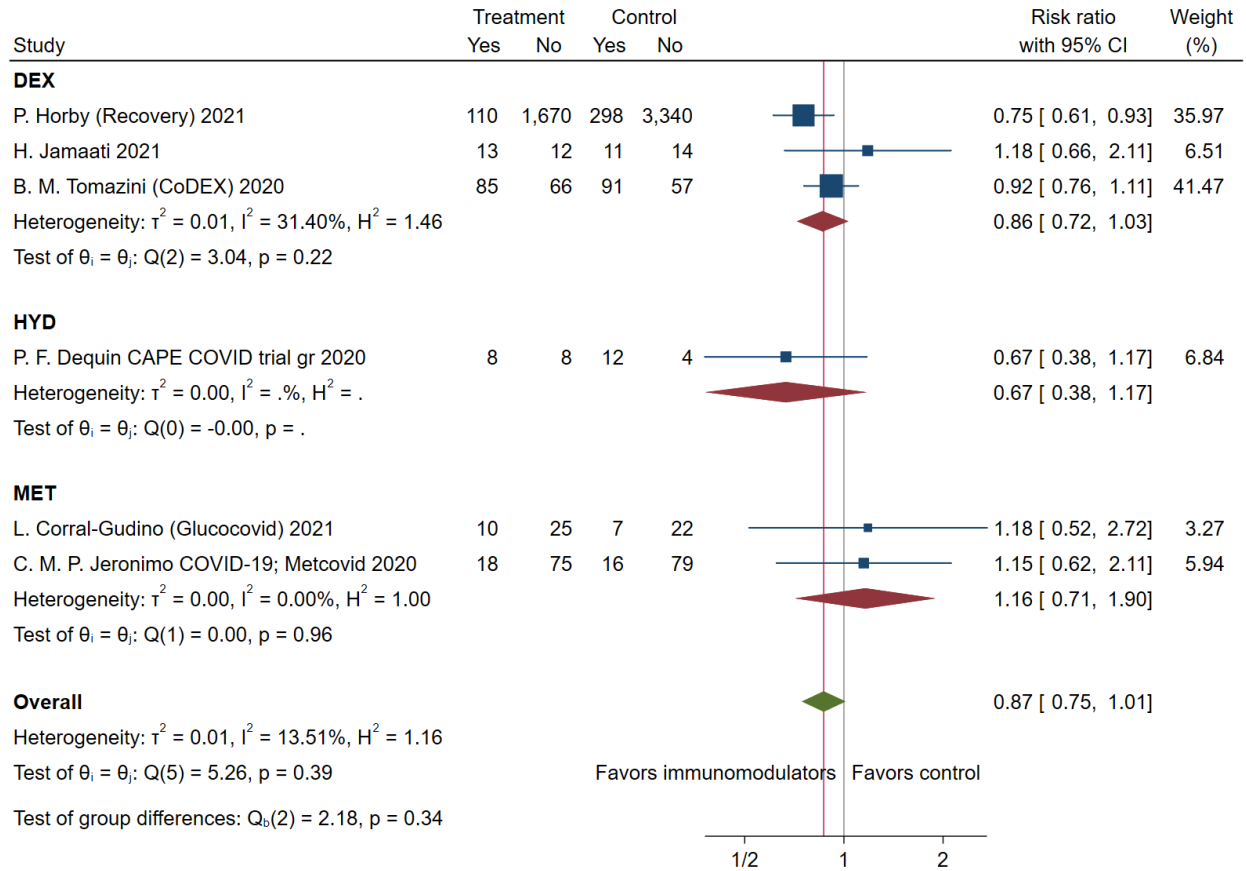

Random-effects REML model

Figure S9: Forest plot the effect of corticosteroid on incidence of IMV in direct meta-analysis subgroup by types of corticosteroid

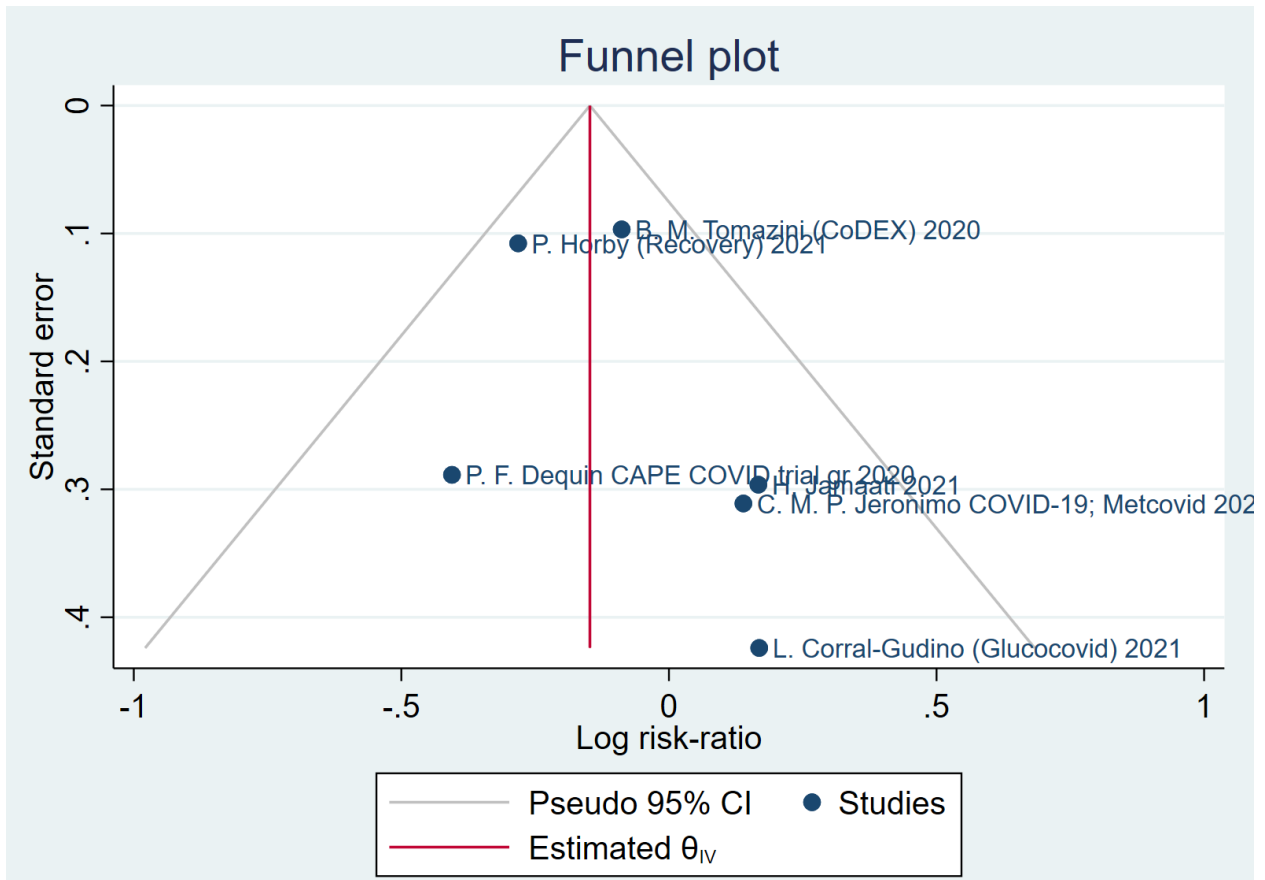

Figure S10: funnel plots the effect of corticosteroid on incidence of IMV (egger's test; p=0.345)

### 4.1.3 superimposed infection

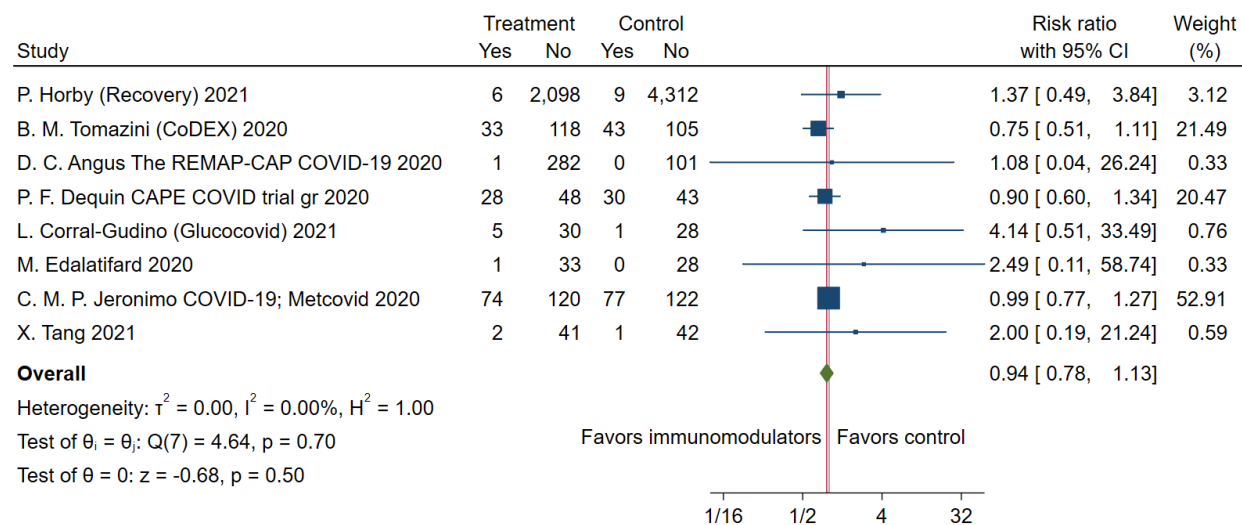

Random-effects REML model

Figure S11: Forest plot the effect of corticosteroid on superimposed infection in direct meta-analysis

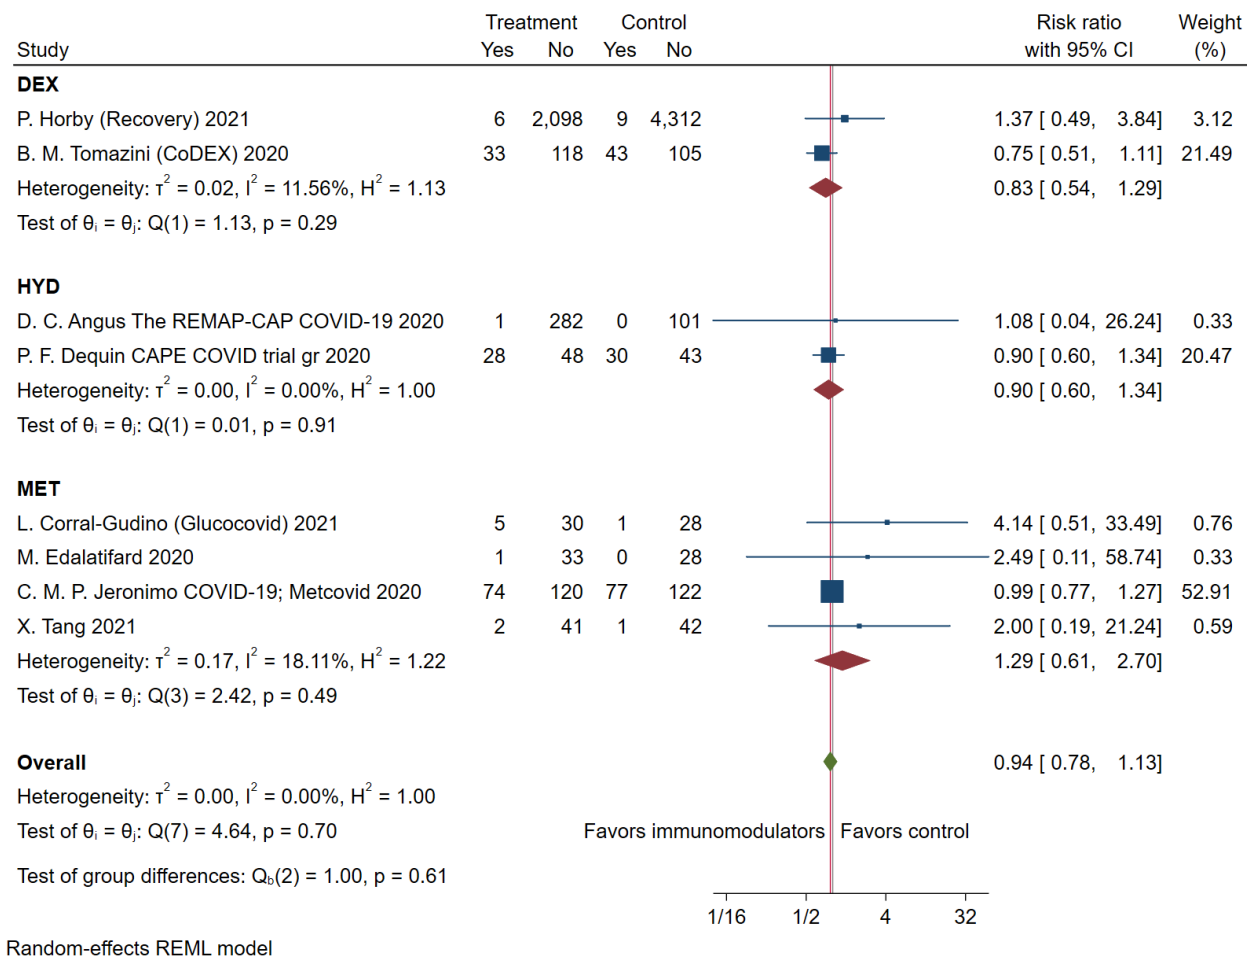

Figure S12: Forest plot the effect of corticosteroid on superimposed infection in direct meta-analysis subgroup by types of corticosteroid

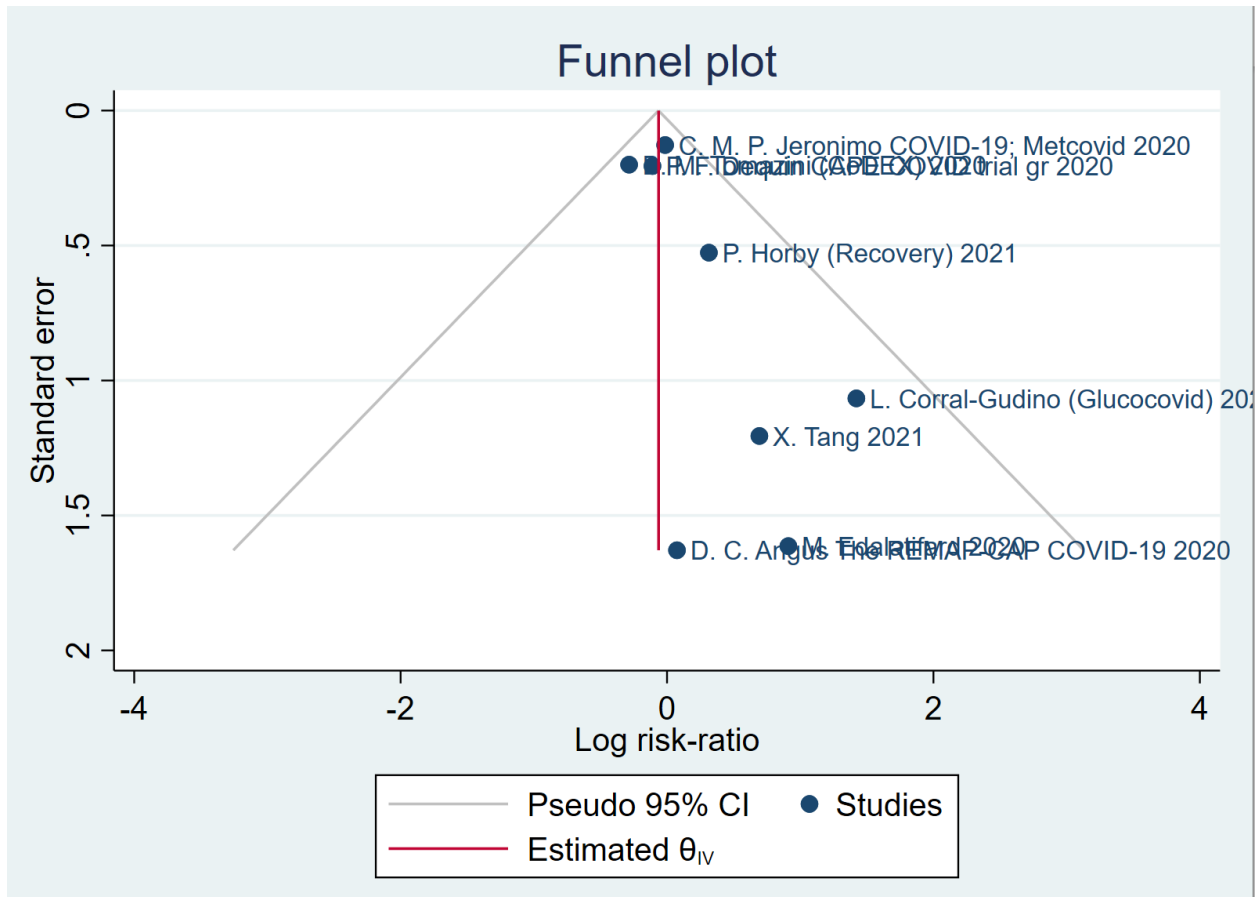

Figure S13: funnel plots the effect of corticosteroid on superimposed infection (egger's test; p=0.191)

**b. Interleukin (IL) antagonists**  
**i. mortality rate outcome**

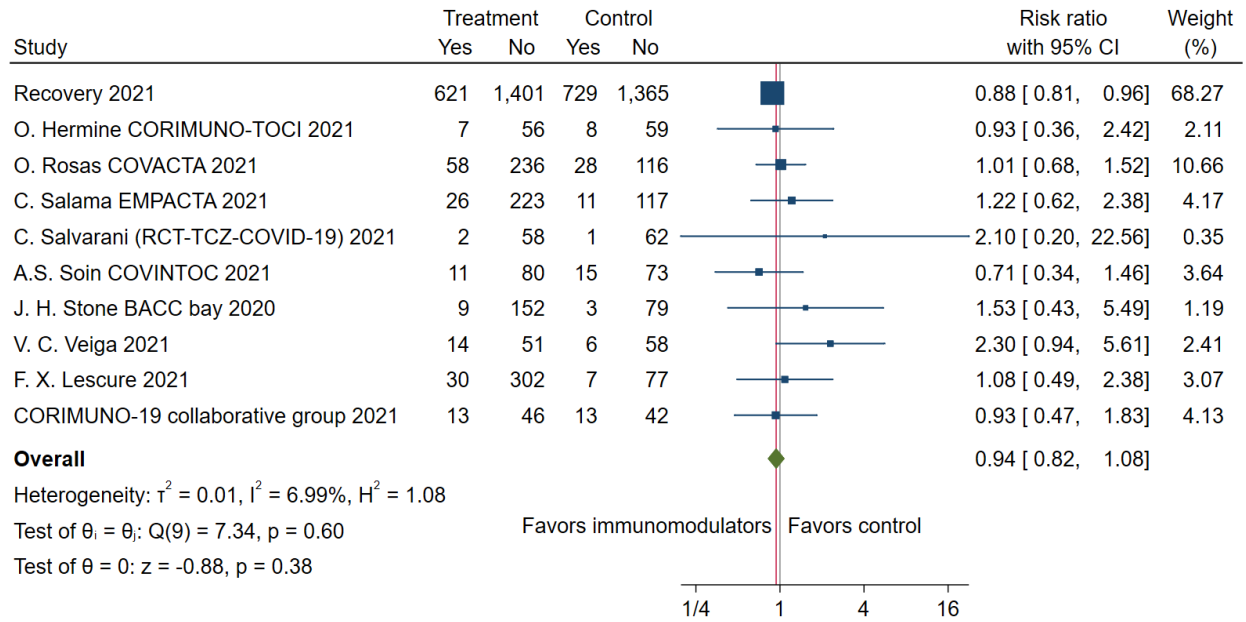

Random-effects REML model

Figure S14: Forest plot the effect of IL antagonist on mortality rate in direct meta-analysis

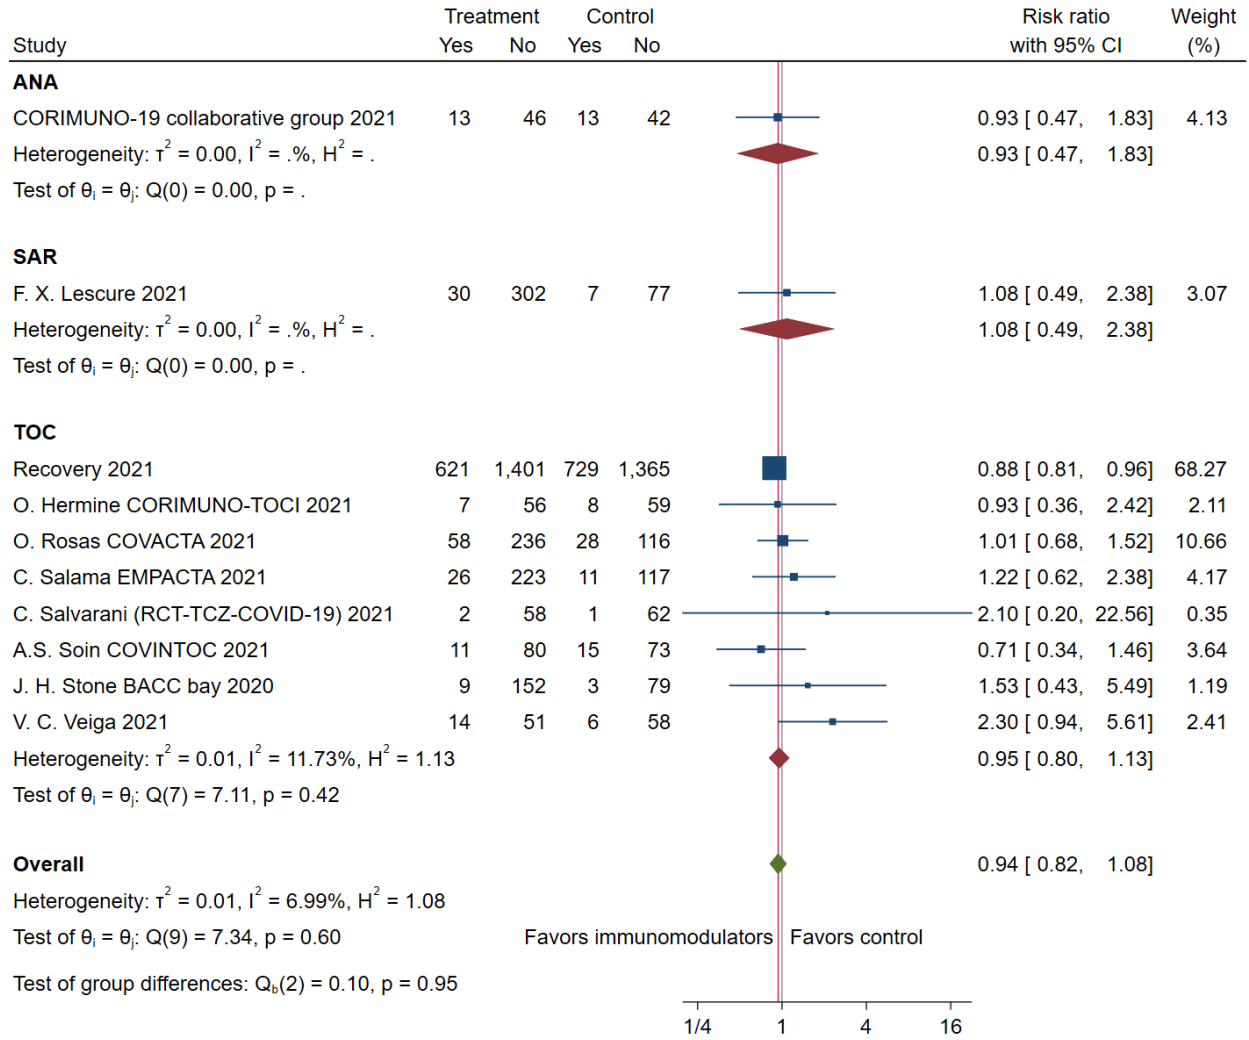

Random-effects REML model

Figure S15: Forest plot the effect of IL antagonist on mortality rate in direct meta-analysis subgroup by types of IL antagonist

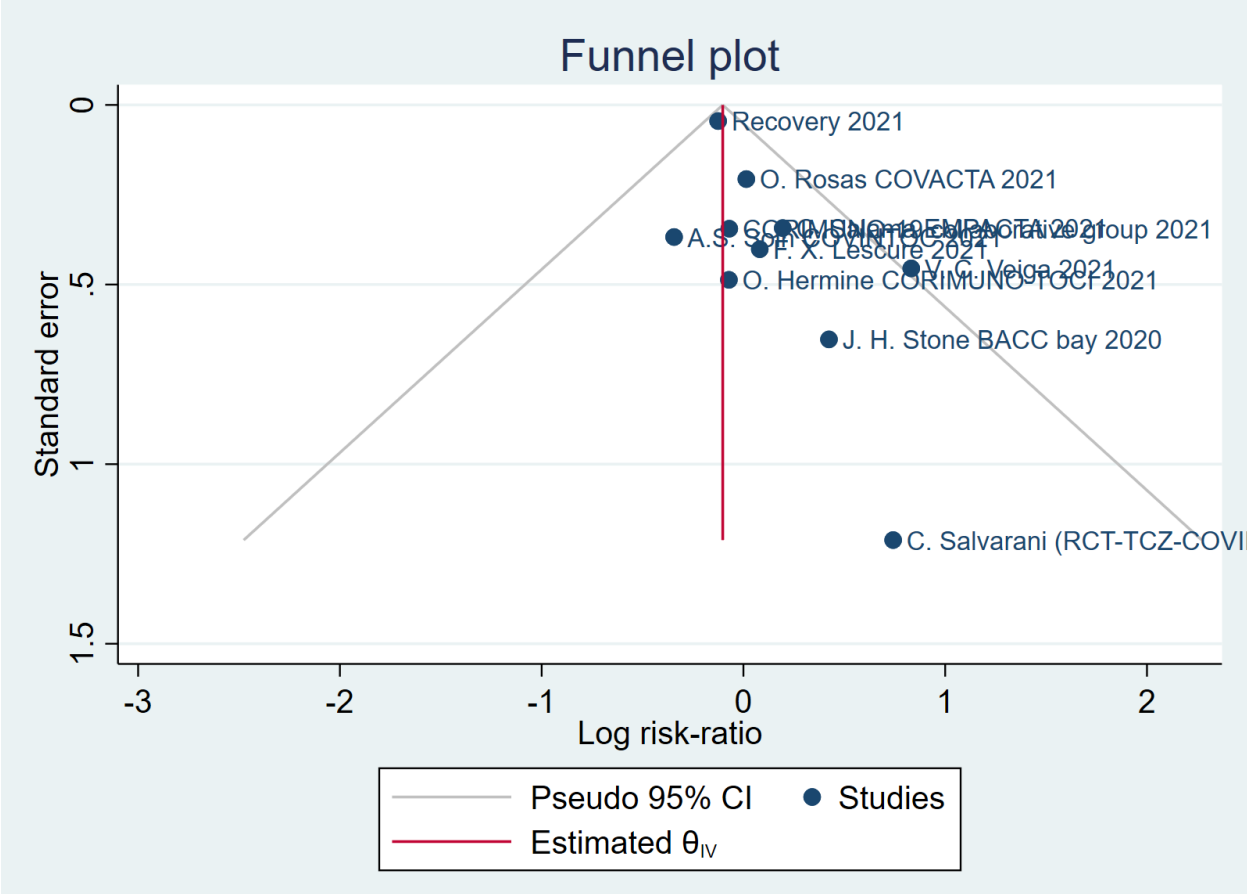

Figure S16: funnel plots the effect of IL antagonists on mortality rate (egger's test; p=0.08)



#### 4.2.2 incidence of IMV

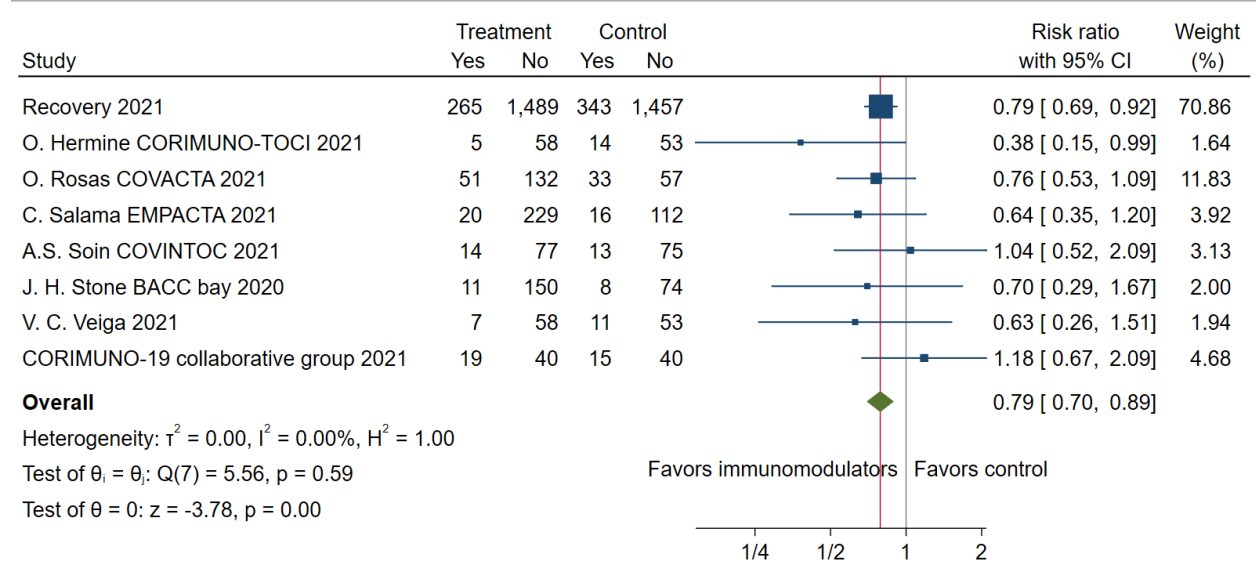

Random-effects REML model

Figure S17: Forest plot the effect of IL antagonist on incidence of IMV in direct meta-analysis

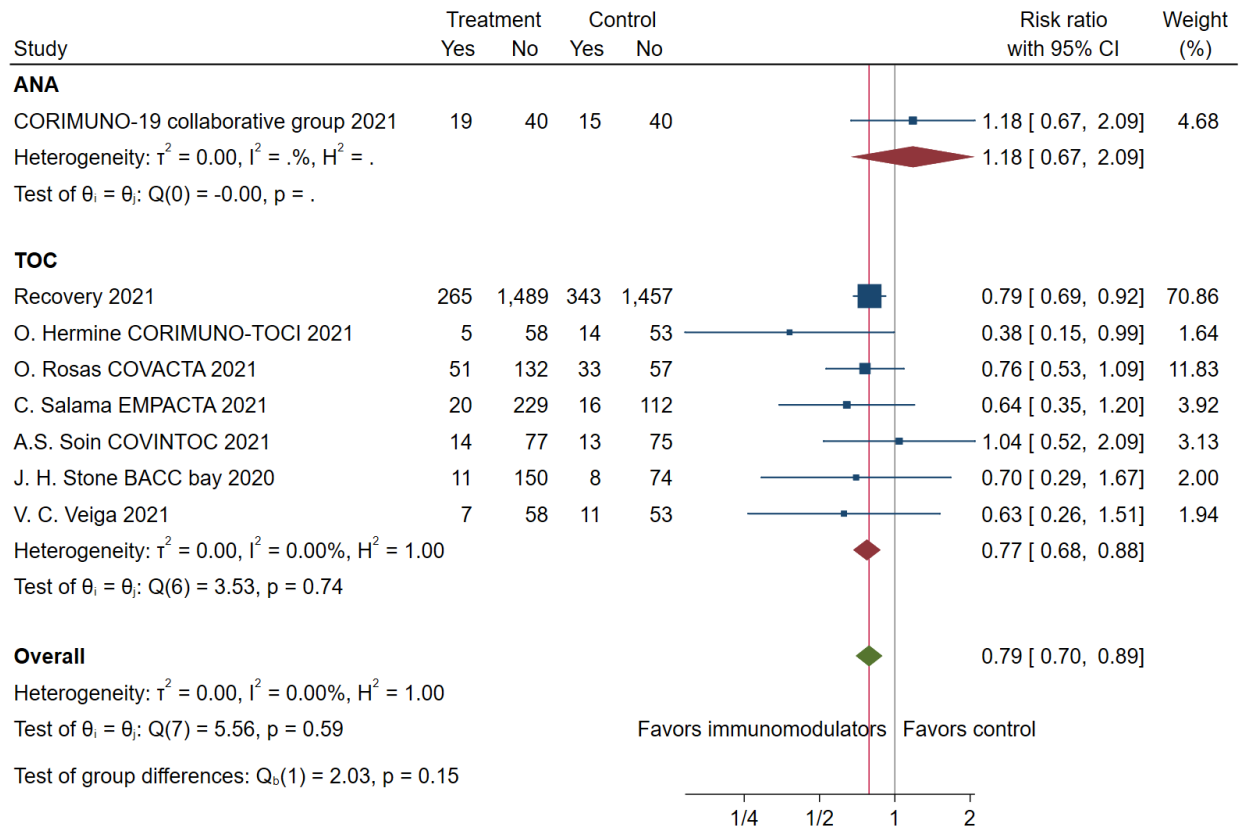

Random-effects REML model

Figure S18: Forest plot the effect of IL antagonist on incidence of IMV in direct meta-analysis subgroup by types of IL antagonist

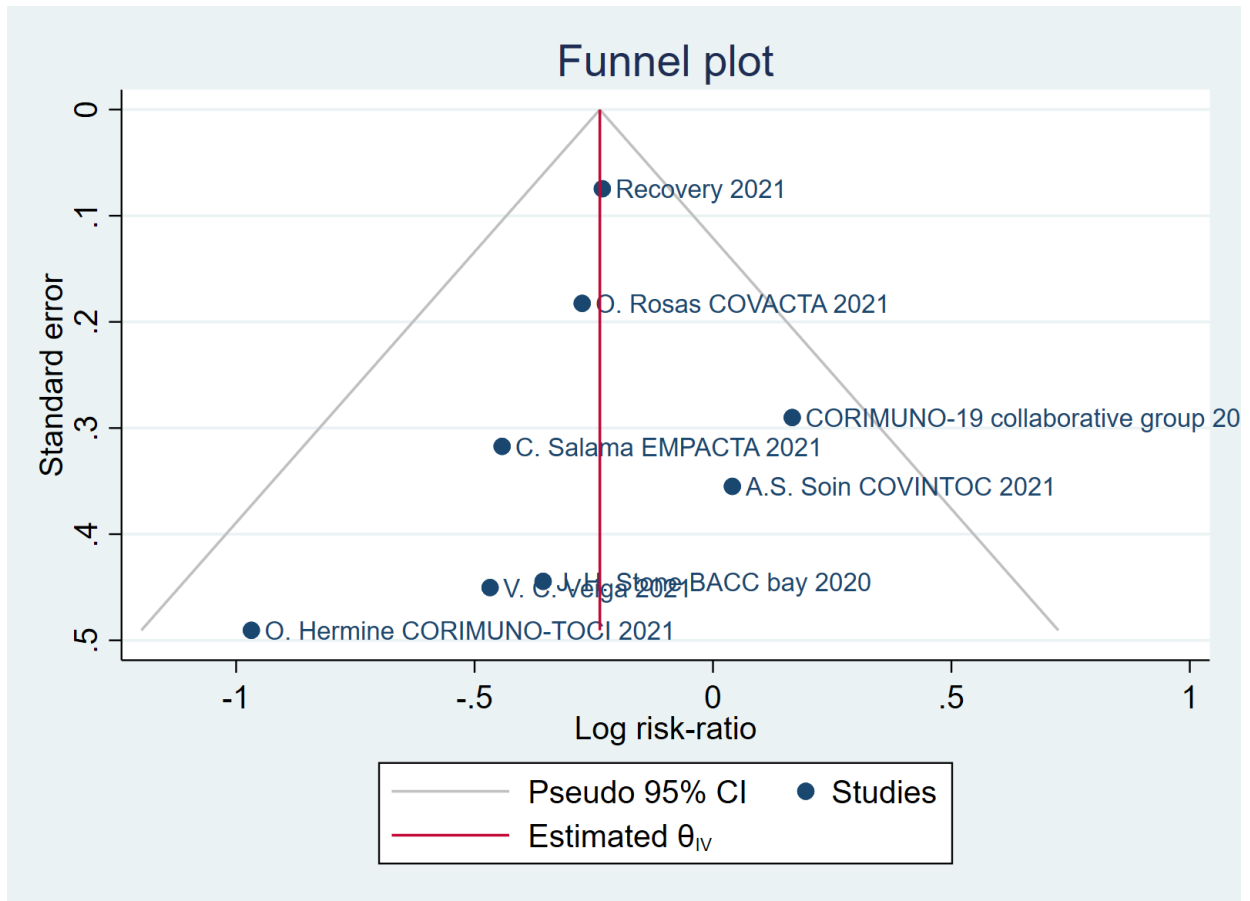

Figure S19: funnel plots the effect of IL antagonists on incidence of IMV (egger's test;  $p=0.626$ )

### 4.2.3 superimposed infection

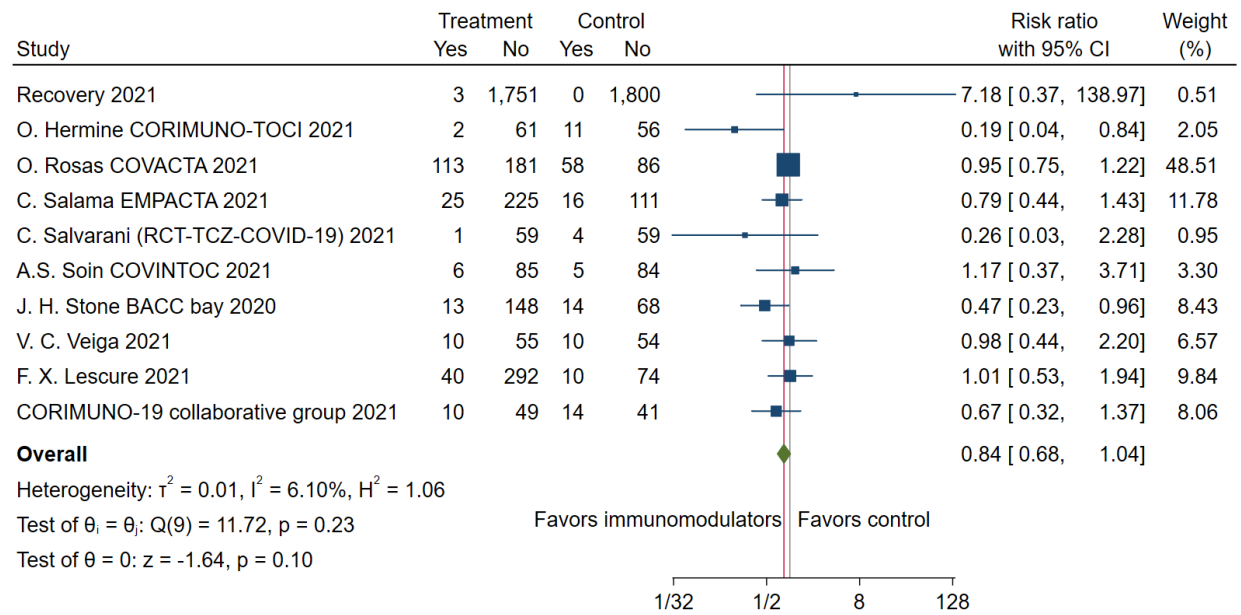

Random-effects REML model

Figure S20: Forest plot the effect of IL antagonist on superimposed infection in direct meta-analysis

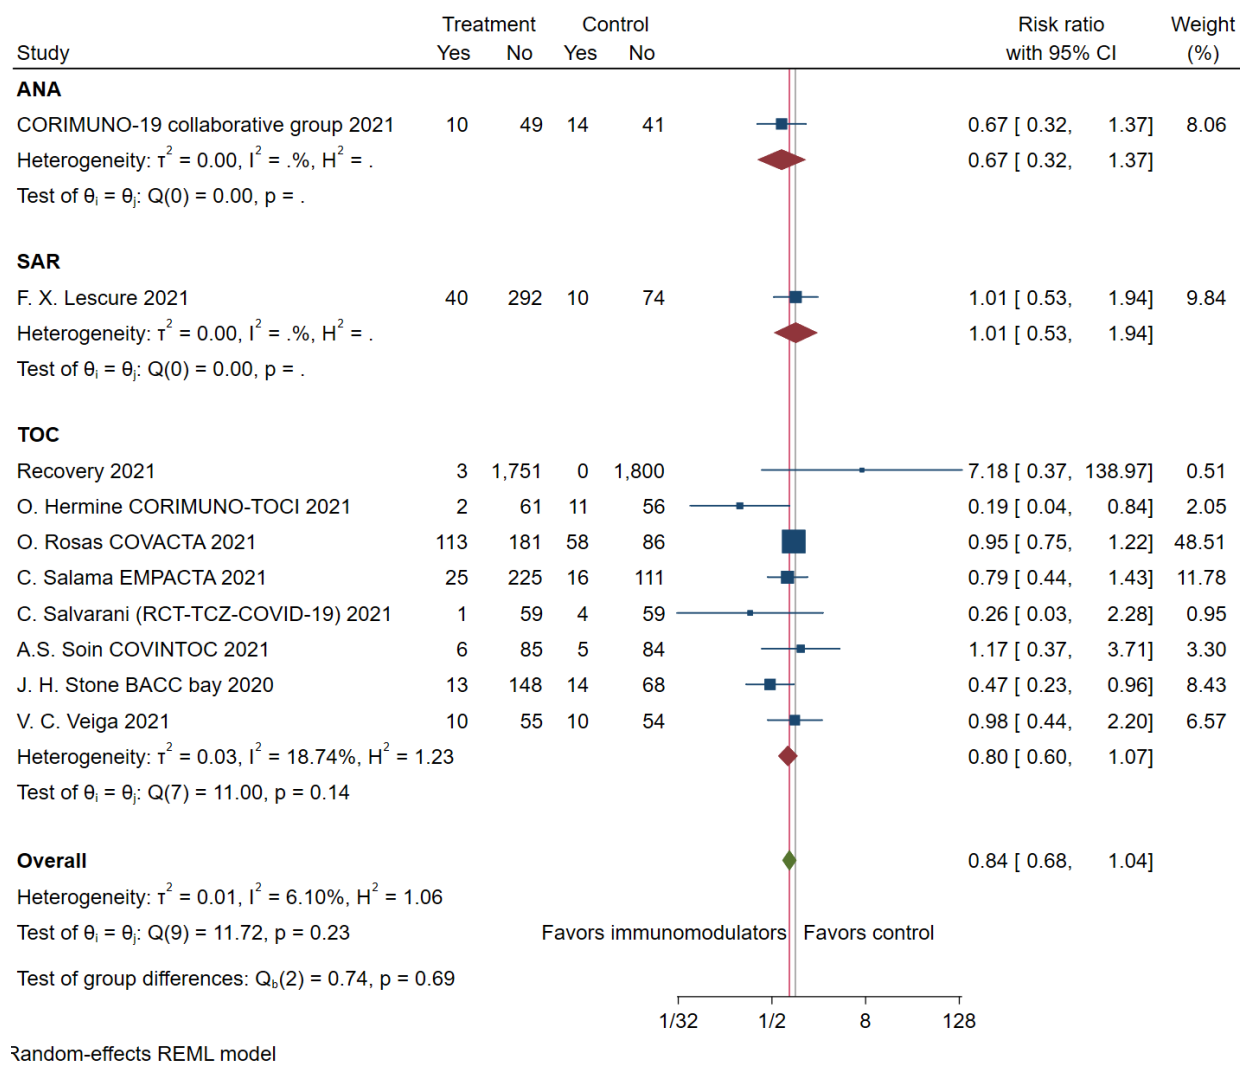

Figure S21: Forest plot the effect of IL antagonist on superimposed infection in direct meta-analysis subgroup by types of IL antagonist

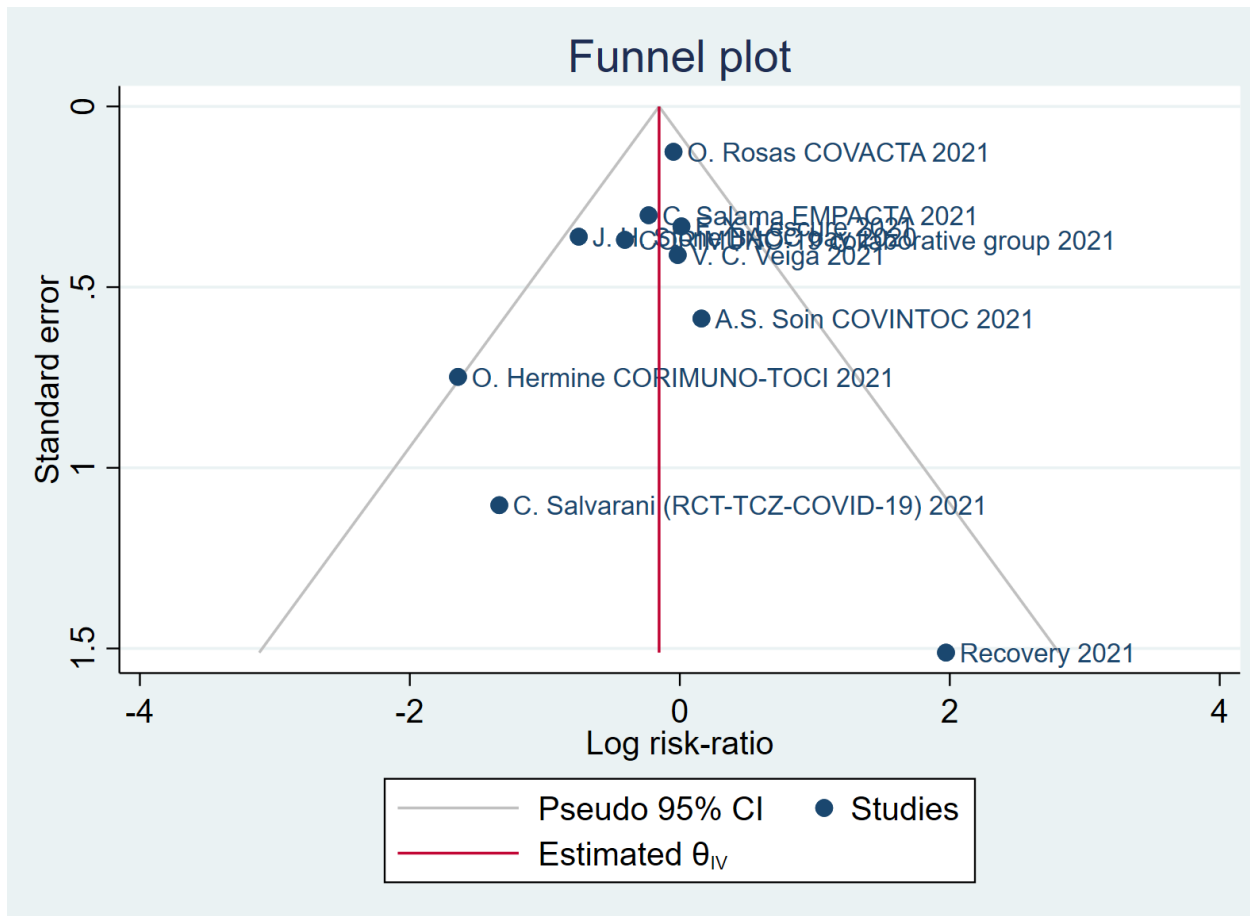

Figure S22: funnel plots the effect of IL antagonists on superimposed infection (egger's test;  $p=0.276$ )

**c. JAK inhibitors**  
**4.3.1 mortality rate**

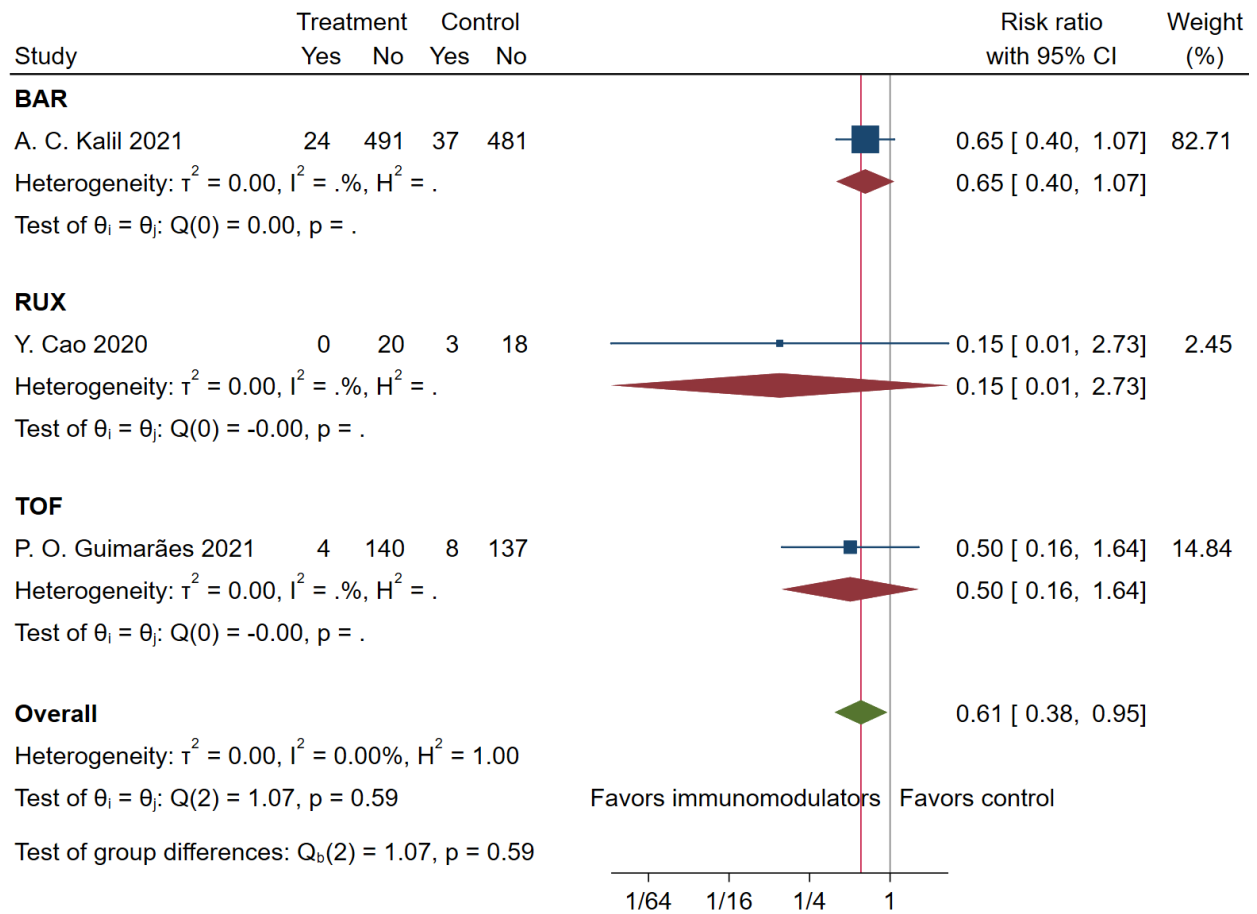

Random-effects REML model

Figure S23: Forest plot the effect of JAK inhibitors on mortality rate in direct meta-analysis

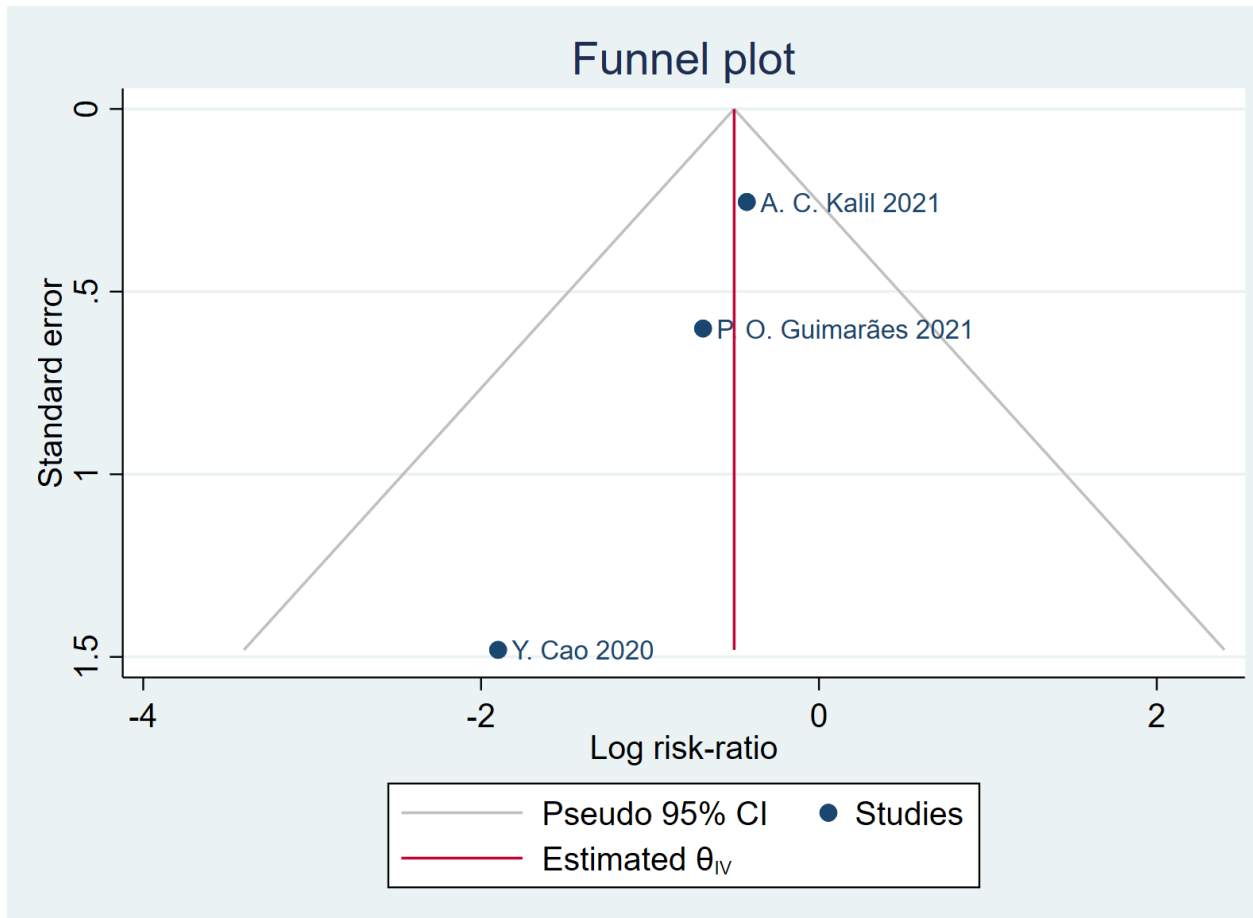

Figure S24: funnel plots the effect of JAK inhibitors on mortality rate (egger's test; p=0.311)



### 4.3.2 incidence of IMV (not performed due to insufficient for poolings)

### 4.3.3 superimposed infection

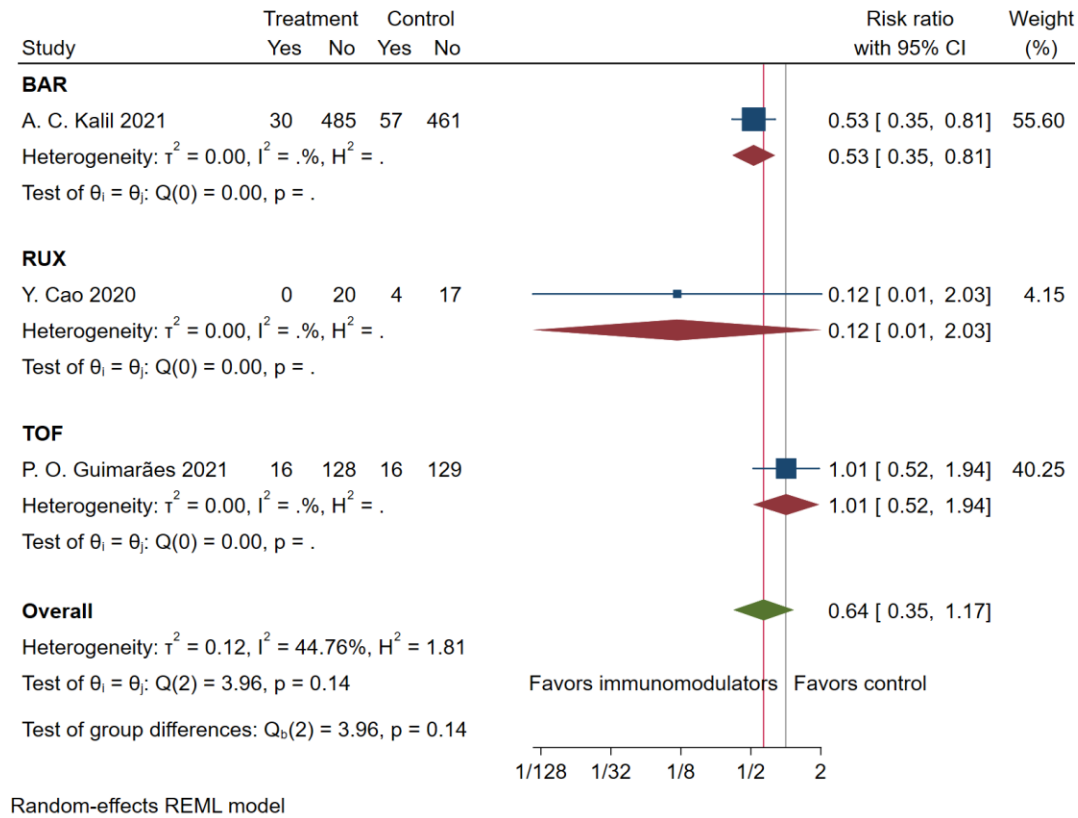

Figure S25: Forest plot the effect of JAK inhibitors on superimposed infection in direct meta-analysis

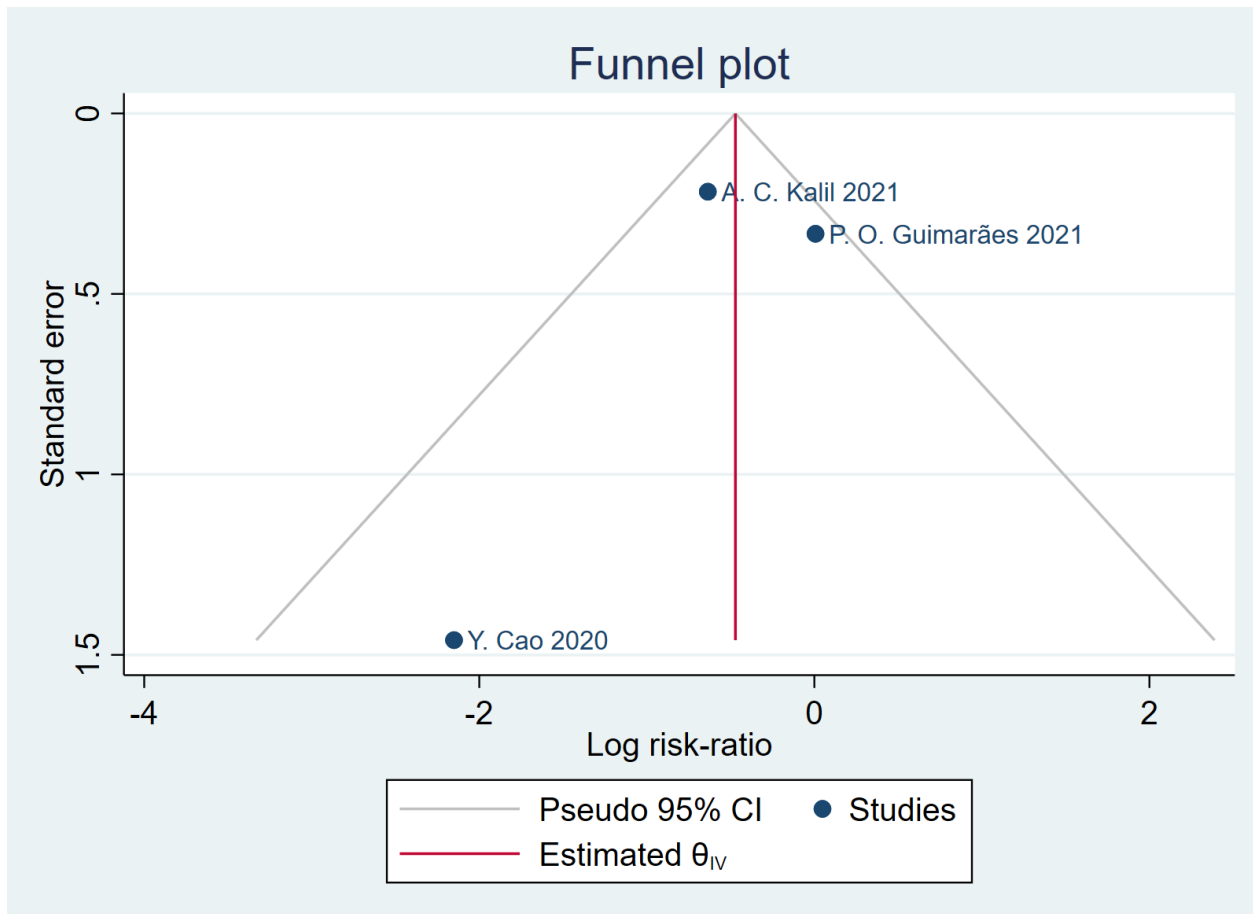

Figure S26: funnel plots the effect of JAK inhibitors on superimposed infection (egger's test;  $p=0.337$ )

## 5. Network map of eligible comparison for efficacy and adverse events

Network meta-analysis of eligible comparisons for mortality rate, incidence of mechanical ventilation and superimposed infection following immunomodulators for COVID-19 treatment. The Figure plots the network of direct comparisons (black bold lines) and indirect comparison (dashed line); (A) mortality rate, (B) incidence of mechanical ventilation and (C) superimposed infection. The width of the lines is proportional to the number of trials comparing every pair of treatment. Size of every circle is proportional to the number of randomly assigned participants (sample size).

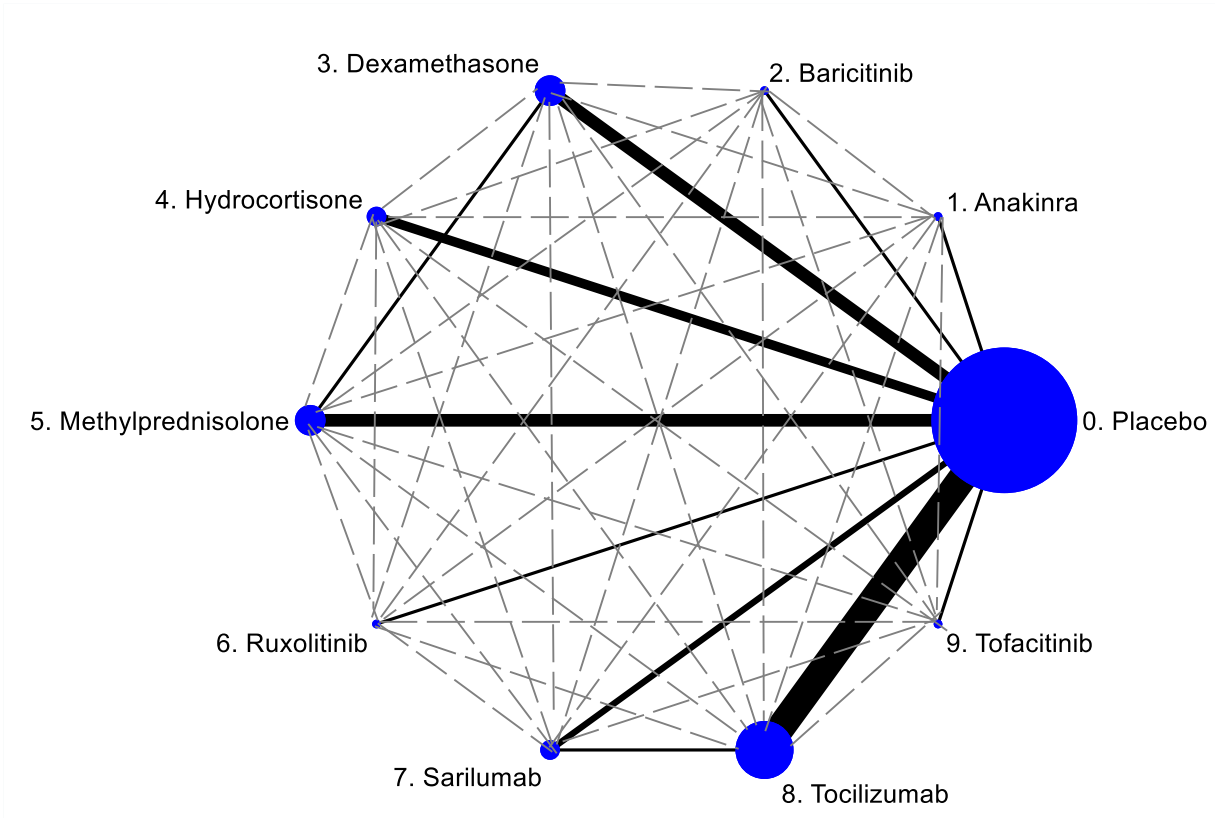

Figure S27A: Network meta-analysis of eligible comparison for mortality rate

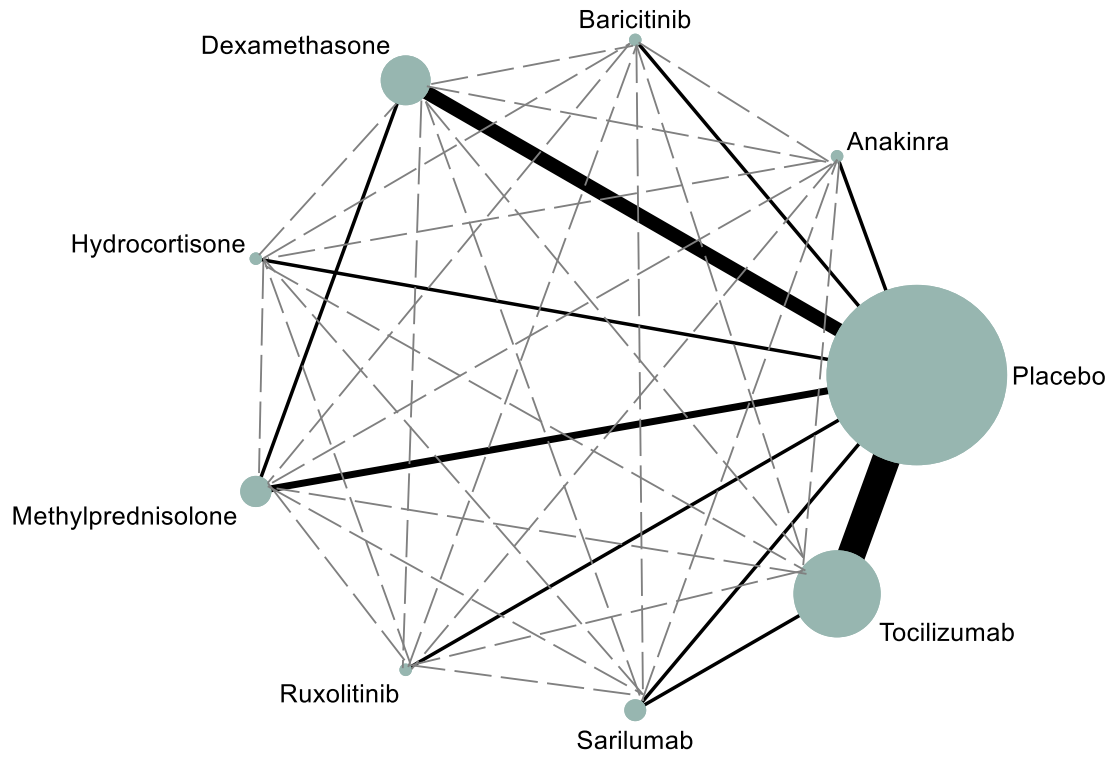

Figure S27B: Network meta-analysis of eligible comparison for incidence of invasive mechanical ventilation

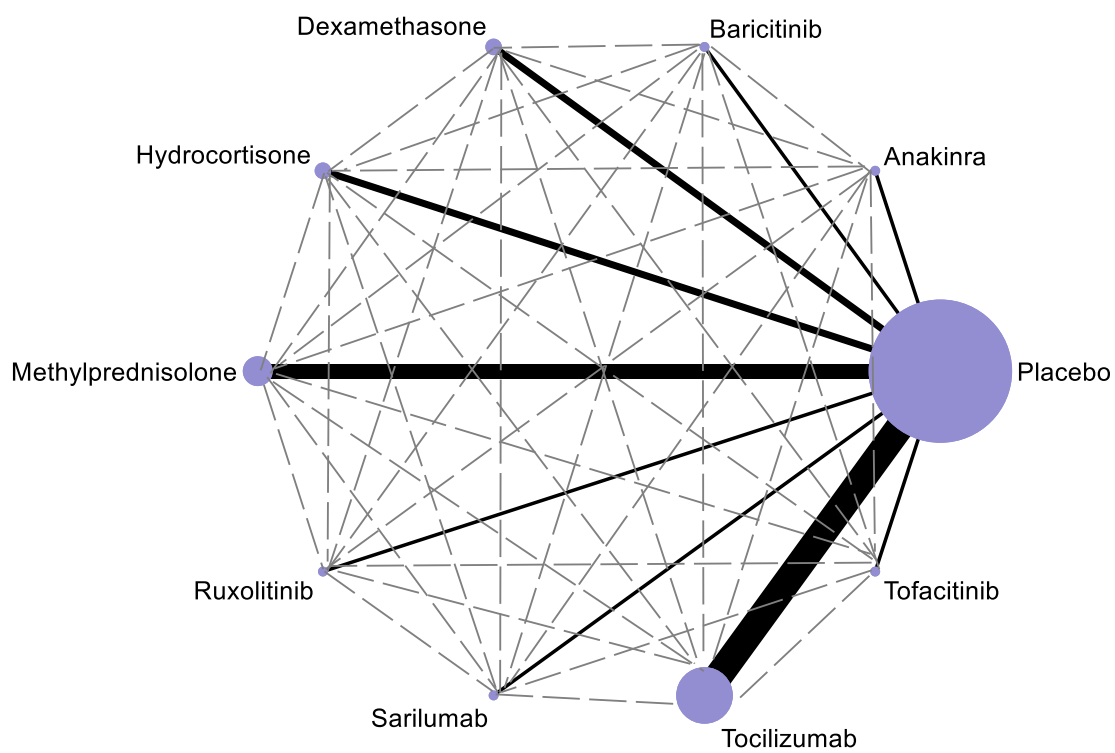

Figure S27C: Network meta-analysis of eligible comparison for superimposed infection

## 6. Network meta-analysis outcome

Table S3: Network meta-analysis of efficacy on mortality rate and superimposed infection

|                                 |                                 |                                 |                                  |                                   |                                                            |                              |                                 |                                |                                                  |
|---------------------------------|---------------------------------|---------------------------------|----------------------------------|-----------------------------------|------------------------------------------------------------|------------------------------|---------------------------------|--------------------------------|--------------------------------------------------|
| <b>ANA</b>                      | 1.21<br>(0.54-2.73)             | 1.05<br>(0.53-2.08)             | 1.02<br>(0.52-2.02)              | 1.14<br>(0.55-2.38)               | 1.10<br>(0.54-2.24)                                        | 1.43<br>(0.62-3.31)          | 6.23<br>(0.32-122.60)           | 1.85<br>(0.48-7.20)            | 0.93<br>(0.47-1.83)                              |
| 0.0868<br>(-0.0951,<br>0.2681)  | <b>SAR</b>                      | 0.87<br>(0.55-1.38)             | 0.85<br>(0.53-1.35)              | 0.94<br>(0.55-1.62)               | 0.91<br>(0.55-1.51)                                        | 1.18<br>(0.60-2.32)          | 5.16<br>(0.27-97.29)            | 1.53<br>(0.43-5.42)            | 0.77<br>(0.49-1.22)                              |
| 0.0601<br>(-0.1006,<br>0.2208)  | -0.0263<br>(-0.1235,<br>0.0708) | <b>TOC</b>                      | 0.97<br>(0.87-1.09)              | 1.08<br>(0.80-1.47)               | 1.05<br>(0.83-1.32)                                        | 1.36<br>(0.82-2.25)          | 5.91<br>(0.32-107.80)           | 1.76<br>(0.54-5.72)            | <b><u>0.88</u></b><br><b><u>(0.82-0.96)*</u></b> |
| 0.0742<br>(-0.0898,<br>0.2382)  | 0.0123<br>(-0.0902,<br>0.1148)  | -0.0140<br>(-0.0666,<br>0.0384) | <b>DEX</b>                       | 1.11<br>(0.82-1.51)               | 1.08<br>(0.85-1.35)                                        | 1.39<br>(0.84-2.31)          | 6.08<br>(0.33-110.87)           | 1.81<br>(0.55-5.89)            | <b><u>0.91</u></b><br><b><u>(0.84-0.99)*</u></b> |
| 0.0817<br>(-0.0827,<br>0.2462)  | 0.0048<br>(-0.0984,<br>0.1079)  | -0.0216<br>(-0.0789,<br>0.0357) | 0.0075<br>(-0.0584,<br>0.0735)   | <b>HYD</b>                        | 0.97<br>(0.67-1.40)                                        | 1.25<br>(0.70-2.24)          | 5.47<br>(0.30-101.04)           | 1.62<br>(0.48-5.47)            | 0.82<br>(0.61-1.10)                              |
| 0.1137<br>(-0.0518,<br>0.2792)  | -0.0272<br>(-0.1322,<br>0.0777) | -0.0536<br>(-0.1164,<br>0.0092) | 0.0396<br>(-0.0313,<br>0.1104)   | 0.0320<br>(-0.0393,<br>0.1034)    | <b>MET</b>                                                 | 1.30<br>(0.75-2.23)          | 5.65<br>(0.31-103.73)           | 1.68<br>(0.51-5.56)            | 0.85<br>(0.68-1.05)                              |
| 0.0327<br>(-0.1343,<br>0.2009)  | -0.0037<br>(-0.0037,<br>0.1135) | 0.0268<br>(-0.0406,<br>0.0943)  | 0.0409<br>(-0.0341,<br>0.1159)   | -0.0491<br>(-0.1580,<br>0.0598)   | <b><u>0.0805</u></b><br><b><u>(0.0022, -0.1587)*</u></b>   | <b>BAR</b>                   | 4.36<br>(0.23-82.86)            | 1.30<br>(0.36-4.66)            | 0.65<br>(0.40-1.07)                              |
| -0.0957<br>(-0.3399,<br>0.1485) | 0.1821<br>(-0.0257,<br>0.3901)  | 0.1558<br>(-0.0341,<br>0.3457)  | -0.1699<br>(-0.3625,<br>0.0228)  | -0.1774<br>(-0.3705,<br>0.0156)   | <b><u>-0.2094</u></b><br><b><u>(-0.4034, -0.0153)*</u></b> | -0.1289<br>(-0.3247,0.0668)  | <b>RUX</b>                      | 0.30<br>(0.01-6.81)            | 0.15<br>(0.01-2.73)                              |
| 0.0858<br>(-0.0936,<br>0.2653)  | -0.0007<br>(-0.1263,<br>0.1250) | 0.0257<br>(-0.0673,<br>0.1187)  | 0.0116<br>(-0.0869,<br>0.1102)   | 0.0041<br>(-0.0952,<br>0.1034)    | -0.0279<br>(-0.1290, 0.0732)                               | 0.0526<br>(-0.0519,0.1570)   | 0.1815<br>(-0.0245,<br>0.3875)  | <b>TOF</b>                     | 0.50<br>(0.16-1.64)                              |
| -0.0850<br>(-0.2422,<br>0.0721) | 0.0014<br>(-0.0896,<br>0.0925)  | -0.0249<br>(-0.0588,<br>0.0089) | -0.0108<br>(-0.0579,<br>0.03617) | -0.0033<br>(-0.05176,<br>0.04512) | 0.0287<br>(-0.0235,0.0804)                                 | -0.0518<br>(-0.1101, 0.0066) | -0.1807<br>(-0.3676,<br>0.0062) | 0.0007<br>(-0.0858,<br>0.0874) | <b>SOC</b>                                       |

\*statistical significance are in bold and underscored, NA = Not available values, RR=Risk Ratio, RD=Risk Difference

mortality rate (RR with 95%CI)
  superimposed infection (RD with 95%CI)
  treatment

Drug are reported in order of types of immunomodulators; interleukin antagonist, corticosteroid and JAK inhibitors. Comparisons between treatments should be read from left to right and the estimate is in the cell in common between the column-defining treatment and the row-defining treatment. For mortality rate, RRs less than 1 favor the row-defining treatment. For superimposed infection, RDs below 0 favor the column-defining treatment. To obtain RDs for comparisons in the opposite direction, negative values should be converted into positive values, and vice versa. To obtain RRs for comparisons in the opposite direction, reciprocals should be taken.

**Table S4: Network meta-analysis of efficacy on IMV and superimposed infection**

|                              |                              |                              |                                                  |                                |                                                            |                              |                              |                             |                                                  |
|------------------------------|------------------------------|------------------------------|--------------------------------------------------|--------------------------------|------------------------------------------------------------|------------------------------|------------------------------|-----------------------------|--------------------------------------------------|
| <b>ANA</b>                   | 3.14<br>(1.23-8.00)          | 1.51<br>(0.84-2.69)          | 1.34<br>(0.75-2.41)                              | 1.77<br>(0.79-3.95)            | 1.39<br>(0.69-2.81)                                        | 1.80<br>(0.92-3.50)          | 7.89<br>(0.41-151.86)        | NA                          | 1.18<br>(0.67-2.09)                              |
| 0.0868<br>(-0.0951, 0.2681)  | <b>SAR</b>                   | 2.09<br>(0.99-4.39)          | <b><u>0.43</u></b><br><b><u>(0.20-0.91)*</u></b> | 0.56<br>(0.22-1.43)            | 0.44<br>(0.19-1.03)                                        | 0.57<br>(0.25-1.30)          | 0.40<br>(0.02-7.97)          | NA                          | <b><u>0.38</u></b><br><b><u>(0.18-0.79)*</u></b> |
| 0.0601<br>(-0.1006, 0.2208)  | -0.0263<br>(-0.1235, 0.0708) | <b>TOC</b>                   | 1.12<br>(0.94-1.34)                              | 0.85<br>(0.48-1.51)            | 1.08<br>(0.71-1.66)                                        | 0.84<br>(0.58-1.21)          | 0.19<br>(0.01-3.48)          | NA                          | <b><u>0.78</u></b><br><b><u>(0.70-0.87)*</u></b> |
| 0.0742<br>(-0.0898, 0.2382)  | 0.0123<br>(-0.0902, 0.1148)  | -0.0140<br>(-0.0666, 0.0384) | <b>DEX</b>                                       | 0.76<br>(0.42-1.35)            | 0.96<br>(0.63-1.47)                                        | 0.75<br>(0.51-1.08)          | 0.17<br>(0.01-3.11)          | NA                          | 0.88<br>(0.77-1.01)                              |
| 0.0817<br>(-0.0827, 0.2462)  | 0.0048<br>(-0.0984, 0.1079)  | -0.0216<br>(-0.0789, 0.0357) | 0.0075<br>(-0.0584, 0.0735)                      | <b>HYD</b>                     | 0.79<br>(0.39-1.58)                                        | 0.99<br>(0.51-1.92)          | 0.22<br>(0.01-4.32)          | NA                          | 0.67<br>(0.38-1.17)                              |
| 0.1137<br>(-0.0518, 0.2792)  | -0.0272<br>(-0.1322, 0.0777) | -0.0536<br>(-0.1164, 0.0092) | 0.0396<br>(-0.0313, 0.1104)                      | 0.0320<br>(-0.0393, 0.1034)    | <b>MET</b>                                                 | 0.77<br>(0.45-1.33)          | 0.18<br>(0.01-3.31)          | NA                          | 0.85<br>(0.56-1.28)                              |
| 0.0327<br>(-0.1343, 0.2009)  | -0.0037<br>(-0.0037, 0.1135) | 0.0268<br>(-0.0406, 0.0943)  | 0.0409<br>(-0.0341, 0.1159)                      | -0.0491<br>(-0.1580, 0.0598)   | <b><u>0.0805</u></b><br><b><u>(0.0022, 0.1587)*</u></b>    | <b>BAR</b>                   | 0.23<br>(0.01-4.24)          | NA                          | <b><u>0.66</u></b><br><b><u>(0.46-0.93)*</u></b> |
| -0.0957<br>(-0.3399, 0.1485) | 0.1821<br>(-0.0257, 0.3901)  | 0.1558<br>(-0.0341, 0.3457)  | -0.1699<br>(-0.3625, 0.0228)                     | -0.1774<br>(-0.3705, 0.0156)   | <b><u>-0.2094</u></b><br><b><u>(-0.4034, -0.0153)*</u></b> | -0.1289<br>(-0.3247, 0.0668) | <b>RUX</b>                   | NA                          | 0.15<br>(0.01-2.73)                              |
| 0.0858<br>(-0.0936, 0.2653)  | -0.0007<br>(-0.1263, 0.1250) | 0.0257<br>(-0.0673, 0.1187)  | 0.0116<br>(-0.0869, 0.1102)                      | 0.0041<br>(-0.0952, 0.1034)    | -0.0279<br>(-0.1290, 0.0732)                               | 0.0526<br>(-0.0519, 0.1570)  | 0.1815<br>(-0.0245, 0.3875)  | <b>TOF</b>                  | 0.50 (0.16-1.64)                                 |
| -0.0850<br>(-0.2422, 0.0721) | 0.0014<br>(-0.0896, 0.0925)  | -0.0249<br>(-0.0588, 0.0089) | -0.0108<br>(-0.0579, 0.03617)                    | -0.0033<br>(-0.05176, 0.04512) | 0.0287<br>(-0.0235, 0.0804)                                | -0.0518<br>(-0.1101, 0.0066) | -0.1807<br>(-0.3676, 0.0062) | 0.0007<br>(-0.0858, 0.0874) | <b>SOC</b>                                       |

Incidence of IMV (RR with 95%CI)
  superimposed infection (RD with 95%CI)
  treatment

\*statistical significance are in bold and underscored, NA = Not available value, RR=Risk Ratio, RD=Risk Difference



Drugs are reported in order of types of immunomodulators; interleukin antagonist, corticosteroid and JAK inhibitors. Comparisons between treatments should be read from left to right and the estimate is in the cell in common between the column-defining treatment and the row-defining treatment. For incidence of IMV, RRs less than 1 favor the row-defining treatment. For superimposed infection, RDs below 0 favor the column-defining treatment. To obtain RDs for comparisons in the opposite direction, negative values should be converted into positive values, and vice versa. To obtain RRs for comparisons in the opposite direction, reciprocals should be taken.

**Table S5: The relative treatment effect of corticosteroid in mortality rate and incidence of invasive mechanical ventilation (IMV)**

|                  |                                                   |                  |                  |
|------------------|---------------------------------------------------|------------------|------------------|
| <b>SOC</b>       | <b><u>0.91 (0.84-0.99)</u></b><br>(p-value=0.024) | 0.82 (0.61-1.10) | 0.85 (0.68-1.05) |
| 0.93 (0.66-1.31) | <b>DEX</b>                                        | 0.90 (0.66-1.22) | 0.93 (0.74-1.17) |
| 0.67 (0.34-1.29) | 0.72 (0.34-1.51)                                  | <b>HYD</b>       | 1.03 (0.72-1.49) |
| 0.69 (0.36-1.31) | 0.74 (0.40-1.37)                                  | 1.03 (0.41-2.59) | <b>MET</b>       |

\*statistical significance is in bold and underscored

DEX=dexamethasone. HYD=hydrocortisone. MET=methylprednisolone. SOC=standard of care.

RR=Risk Ratio

mortality rate (RR with 95% CI)
  incidence of IMV (RR with 95% CI)
  corticosteroid

Drugs are reported in alphabetical order. Comparisons between treatments should be read from right to left and the estimate RR is in the cell in common between the column-defining treatment and the row-defining treatment. For mortality rate, RRs less than 1 favor the column-defining treatment. For incidence of mechanical ventilation, RRs less than 1 favor the row-defining treatment. To compare in the opposite direction, reciprocals should be taken.

**Table S6: The relative treatment effect of interleukin (IL) antagonists in mortality rate and incidence of invasive mechanical ventilation (IMV)**

|                                                   |                                                   |                  |                                                   |
|---------------------------------------------------|---------------------------------------------------|------------------|---------------------------------------------------|
| <b>SOC</b>                                        | 0.93 (0.47-1.83)                                  | 0.77 (0.49-1.22) | <b><u>0.88 (0.82,0.96)</u></b><br>(p-value=0.002) |
| 1.18 (0.67-2.09)                                  | <b>ANA</b>                                        | 0.83 (0.37-1.87) | 0.95 (0.48-1.87)                                  |
| <b><u>0.38 (0.18-0.79)</u></b><br>(p-value=0.010) | <b><u>0.32 (0.12,0.81)</u></b><br>(p-value<0.001) | <b>SAR</b>       | 1.15 (0.73-1.81)                                  |
| <b><u>0.78 (0.70-0.87)</u></b><br>(p-value<0.001) | 0.66 (0.37-1.18)                                  | 2.09 (0.99-4.39) | <b>TOC</b>                                        |

\*statistical significance is in bold and underscored

ANA=anakira. SAR=sarilumab. TOC=tocilizumab. SOC=standard of care. RR=Risk Ratio

mortality rate (RR with 95% CI)
  incidence of IMV (RR with 95% CI)
  IL antagonists

Drugs are reported in alphabetical order. Comparisons between treatments should be read from right to left and the estimate RR is in the cell in common between the column-defining treatment and the row-defining treatment. For mortality rate, RRs less than 1 favor the column-defining treatment. For incidence of mechanical ventilation, RRs less than 1 favor the row-defining treatment. To compare in the opposite direction, reciprocals should be taken.

**Table S7: The relative treatment effect of JAK inhibitors in in mortality rate and incidence of invasive mechanical ventilation**

|                  |                  |                                                   |                   |
|------------------|------------------|---------------------------------------------------|-------------------|
| <b>SOC</b>       | 0.65 (0.16-2.60) | <b><u>0.15 (0.02-0.97)</u></b><br>(p-value 0.046) | NA                |
| 0.66 (0.26-1.68) | <b>BAR</b>       | 0.23 (0.04-1.23)                                  | 0.77 (0.19-3.07)  |
| 0.15 (0.01-1.59) | 0.23 (0.02-2.61) | <b>RUX</b>                                        | 3.36 (0.52-21.74) |
| NA               | NA               | NA                                                | <b>TOF</b>        |

statistical significance are in bold and underscored, NA=Not available values  
 BAR=baricitinib. RUX=ruxolitinib. TOF=tofacinib. SOC=standard of care. RR=Risk Ratio

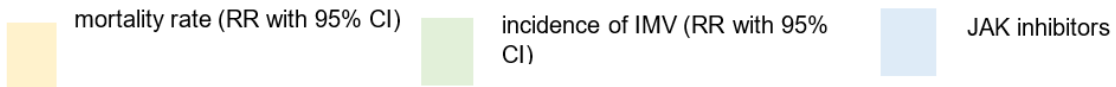

Drugs are reported in alphabetical order. Comparisons between treatments should be read from right to left and the estimate RR is in the cell in common between the column-defining treatment and the row-defining treatment. For mortality rate, RRs less than 1 favor the column-defining treatment. For incidence of mechanical ventilation, RRs less than 1 favor the row-defining treatment. To compare in the opposite direction, reciprocals should be taken.

**Table S8: Results of treatment ranking from network meta-analysis of mortality rate, incidence of IMV and superimposed infection**

| Rank | Mortality rate |       | Incidence of IMV |       | Superimposed infection |       |
|------|----------------|-------|------------------|-------|------------------------|-------|
|      | Treatment      | SUCRA | Treatment        | SUCRA | Treatment              | SUCRA |
| 1    | RUX            | 82.7  | SAR              | 89.2  | RUX                    | 13.1  |
| 2    | TOF            | 76.9  | RUX              | 83.9  | BAR                    | 16.2  |
| 3    | BAR            | 74.4  | BAR              | 64.2  | ANA                    | 33.0  |
| 4    | SAR            | 53.6  | HYD              | 62.1  | TOC                    | 45.7  |
| 5    | HYD            | 52    | TOC              | 51.5  | HYD                    | 55.2  |
| 6    | MET            | 45.3  | MET              | 38.6  | DEX                    | 55.9  |
| 7    | TOC            | 39.1  | DEX              | 35    | TOF                    | 65.6  |
| 8    | ANA            | 34.1  | SOC              | 14.9  | SAR                    | 67.3  |
| 9    | DEX            | 30.9  | ANA              | 10.5  | SOC                    | 71.8  |
| 10   | SOC            | 11.0  | TOF              | NA    | MET                    | 76.2  |

ANA=anakira. SAR=sarilumab. TOC=tocilizumab. DEX=dexamethasone. HYD=hydrocortisone. MET=methylprednisolone. BAR=baricitinib. RUX=ruxolitinib. TOF=tofacitinib. SOC=standard of care.

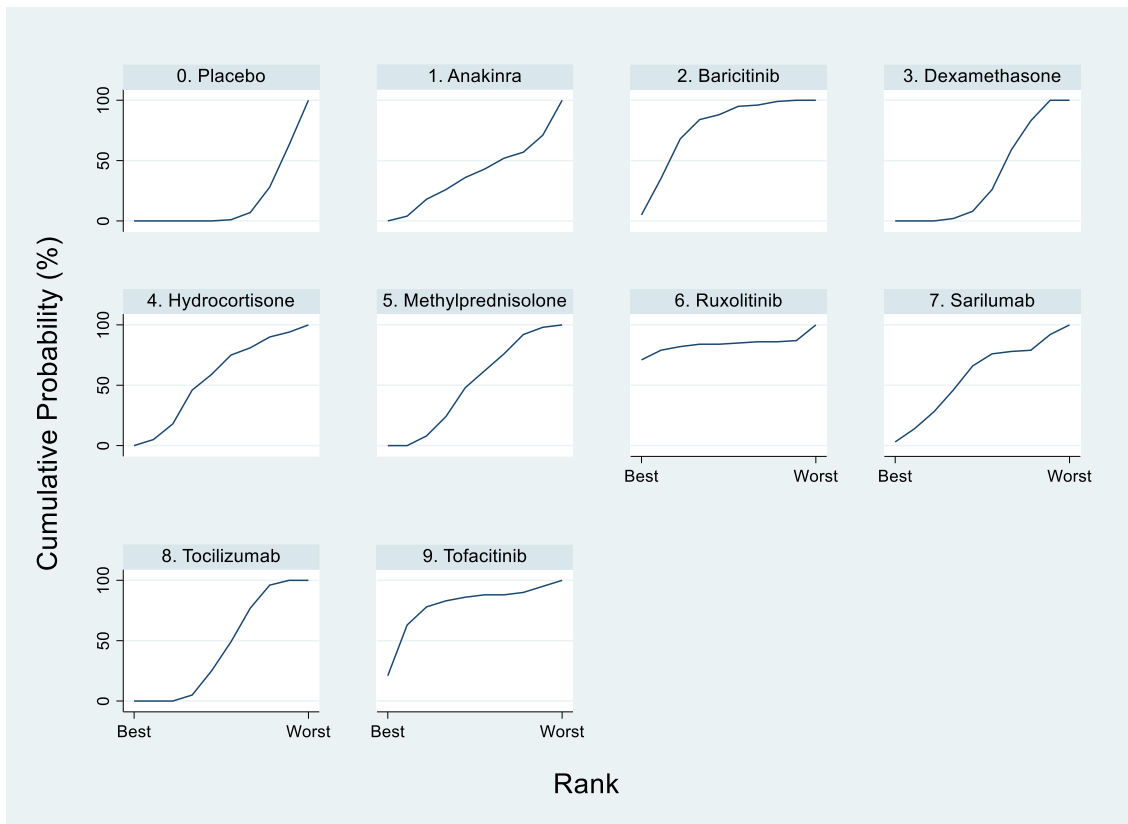

Figure S28: Cumulative Probability (%) of the best treatment in mortality rate with immunomodulators

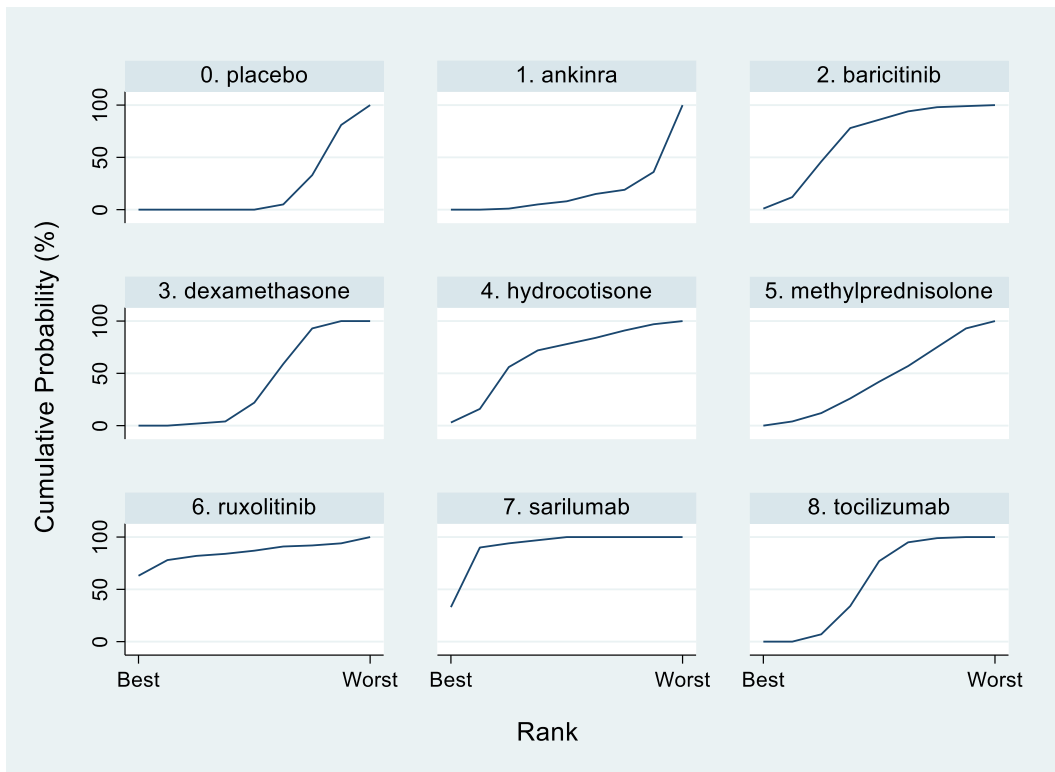

Figure S29: Cumulative Probability (%) of the best treatment in incidence of IMV with immunomodulators

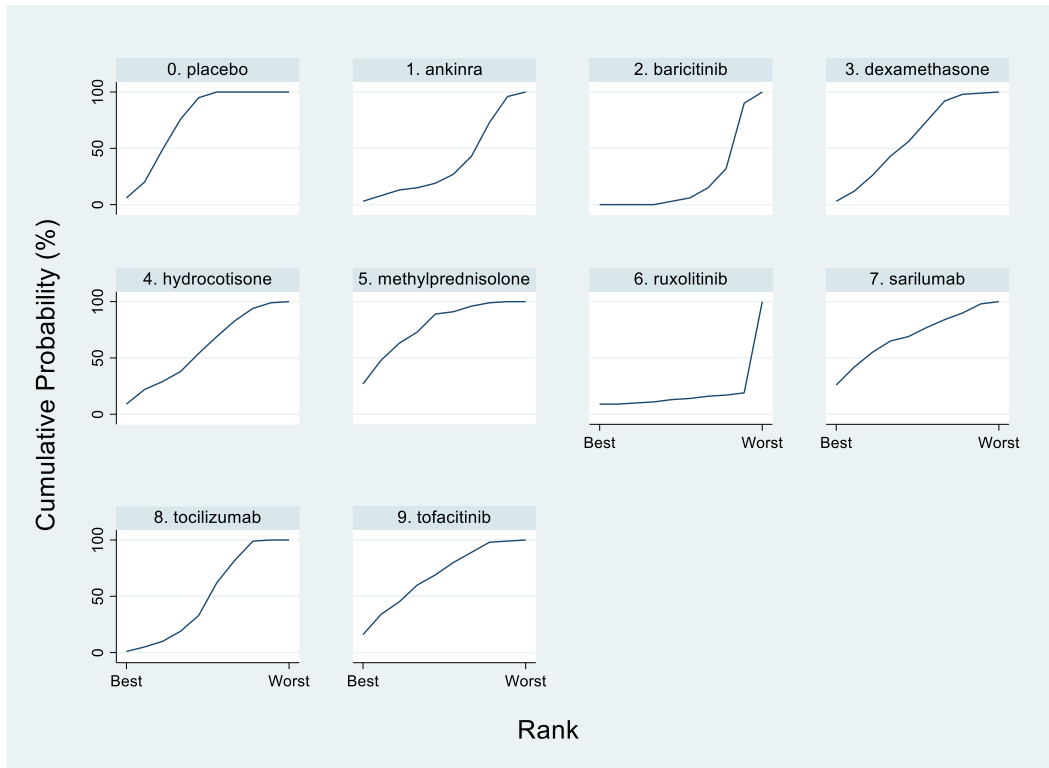

Figure S30: Cumulative Probability (%) of the best treatment in superimposed infection with immunomodulators



## 7. Evaluation of consistency

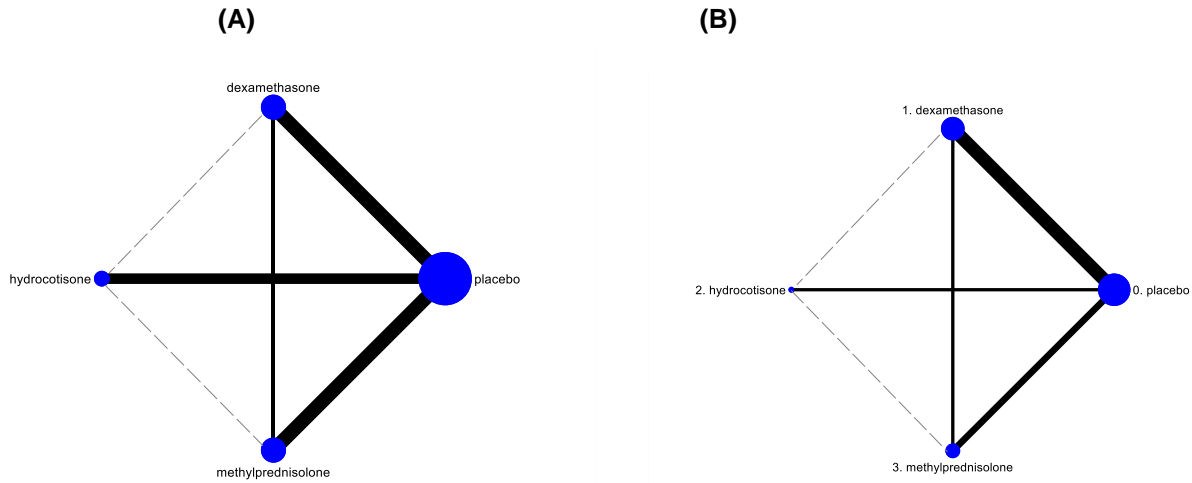

**Figure S31:** Network map of subgroup analysis in mortality rate and incidence of IMV among corticosteroid; mortality rate (A) Inconsistency testing: Chi-square = 2.76,  $p$ -value 0.096, incidence of IMV (B) Inconsistency testing: Chi-square = 3.17,  $p$ -value 0.075

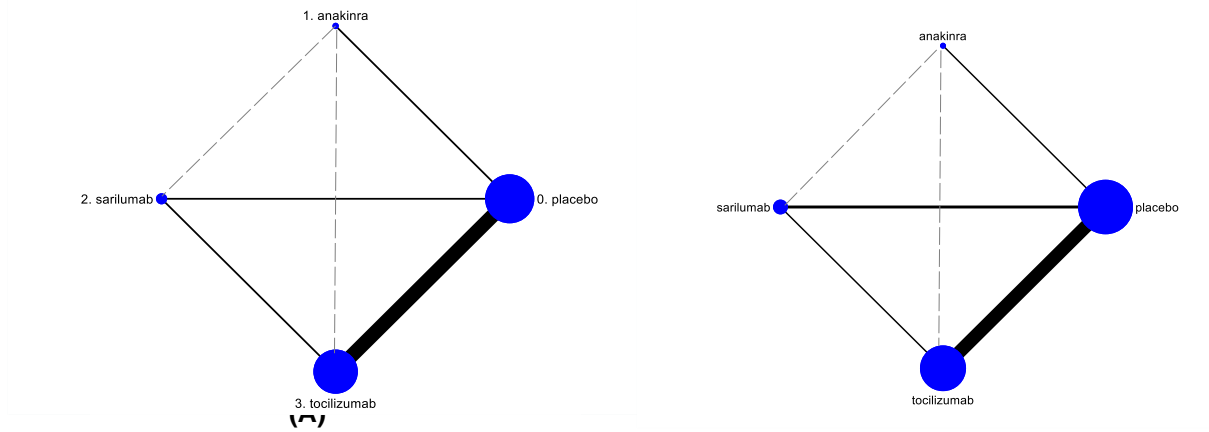

**Figure S32:** Network map of subgroup analysis in mortality rate and incidence of IMV among IL antagonists; mortality rate (A) Inconsistency testing: Chi-square =1.88, *p*-value 0.391, incidence of IMV (B) Inconsistency testing: Chi-square = 0.18, *p*-value 0.674

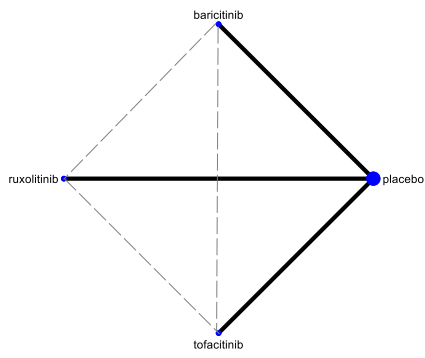

**(A)**

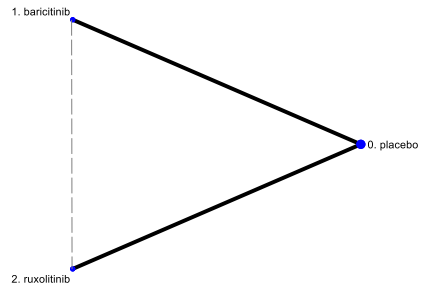

**(B)**

Figure S33: Network map of subgroup analysis in mortality rate and incidence of IMV among JAK inhibitors; mortality rate (A) Inconsistency testing: Chi-square =NA, incidence of IMV (B) Inconsistency testing: Chi-square =2.49,  $p$ -value 0.115

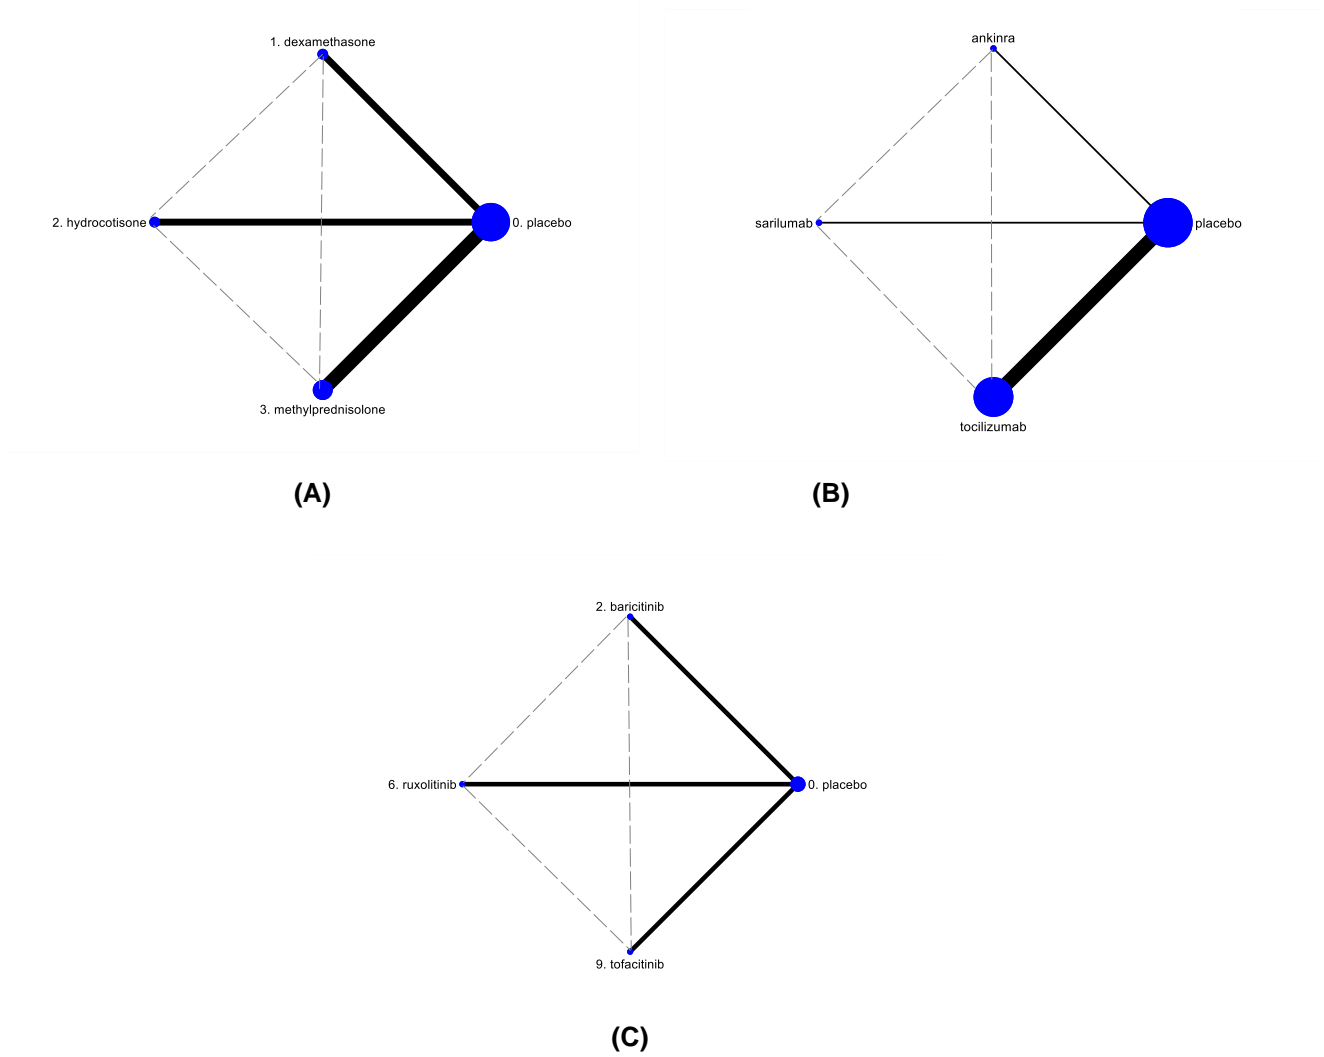

Figure S34: Network map of superimposed infection; corticosteroids (A) Inconsistency testing: Chi-square=0.05,  $p$ -value=0.825; IL antagonist (B) Inconsistency testing: Chi-square=1.45,  $p$ -value=0.228; JAK inhibitors (C) Inconsistency testing: Chi-square=0.00,  $p$ -value=0.997

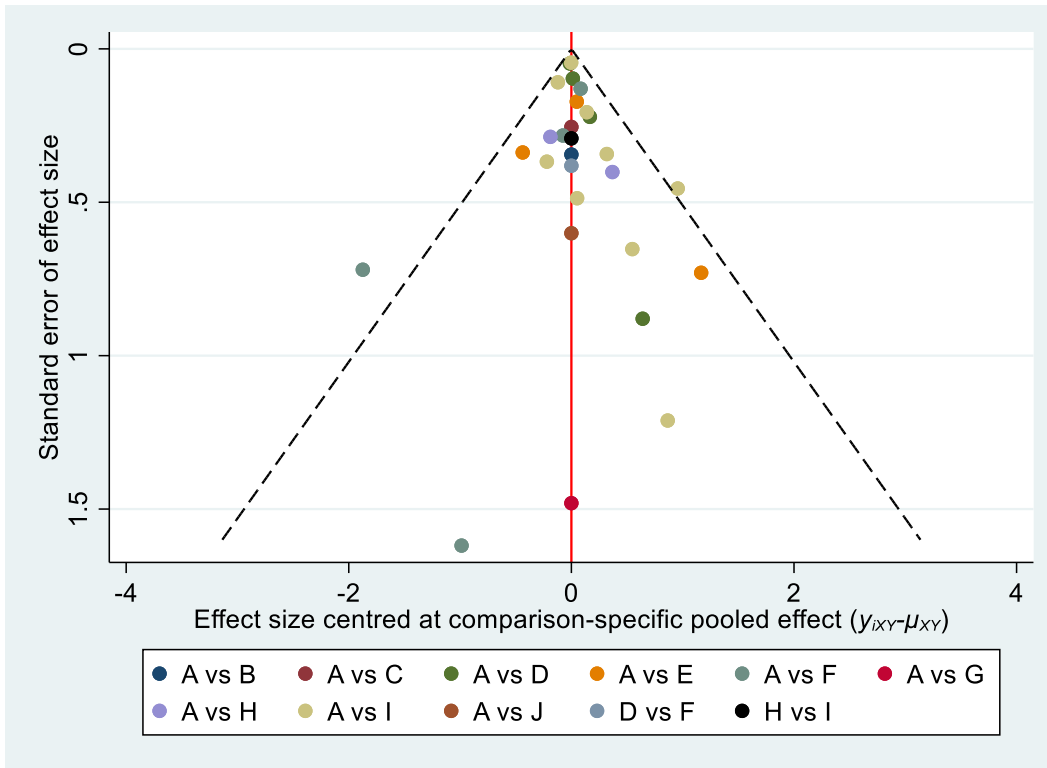

Figure S35: Comparison adjusted funnel plots of mortality rate  
 A="Placebo", B = "Anakinra", C= "Baricitinib", D= "Dexamethasone", E= "Hydrocortisone"  
 F= "Methylprednisolone", G= "Ruxolitinib", H= "Sarilumab, I= "Tocilizumab", J="Tofacitinib"

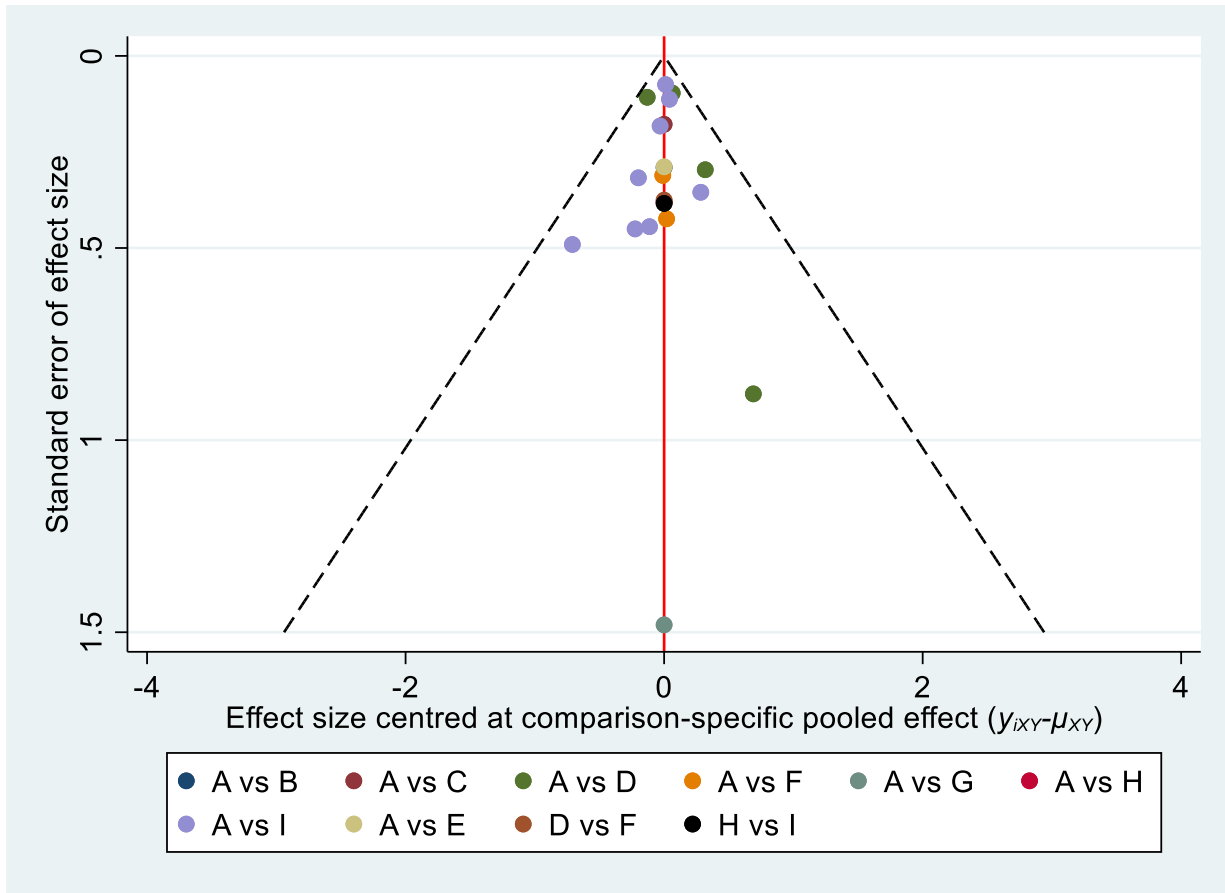

Figure S36: Comparison adjusted funnel plots of incidence of IMV  
 A = "Placebo" B = "Anakinra" C= "Baricitinib" D= "Dexamethasone" E= "Hydrocortisone"  
 F= "Methylprednisolone" G= "Ruxolitinib" H= "Sarilumab" I= "Tocilizumab" J="Tofacitinib"

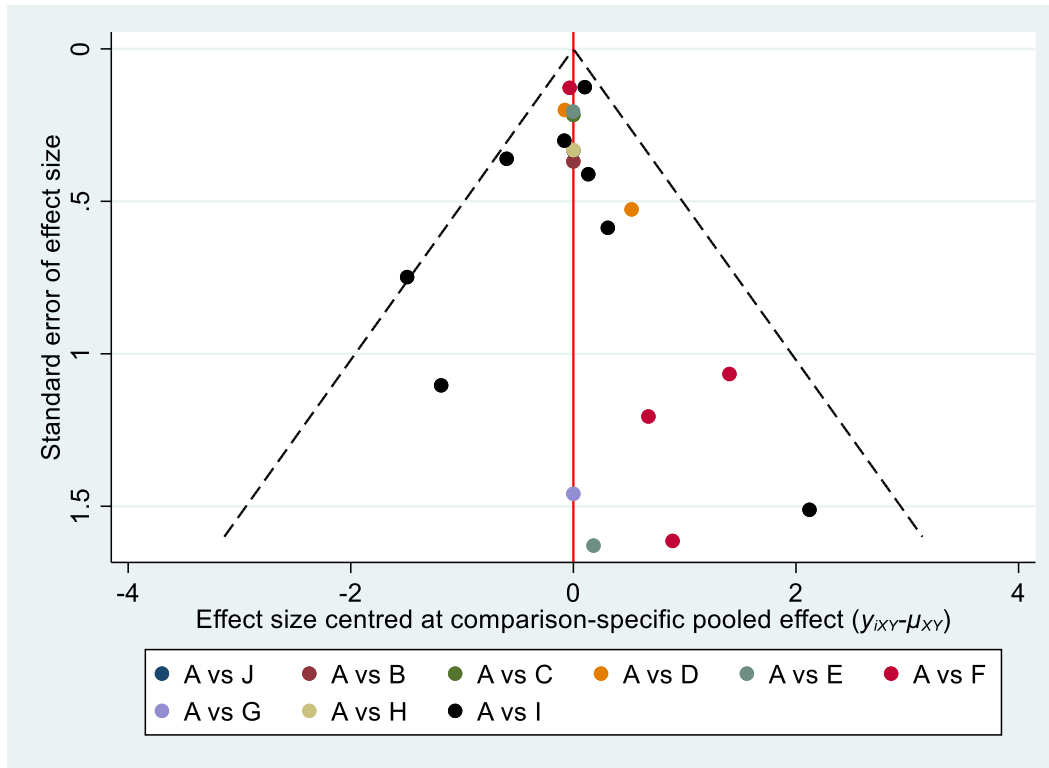

Figure S37: Comparison adjusted funnel plots of superimposed infection  
 A = "Placebo" B = "Anakinra" C= "Baricitinib" D= "Dexamethasone" E= "Hydrocortisone"  
 F= "Methylprednisolone" G= "Ruxolitinib" H= "Sarilumab" I= "Tocilizumab" J="Tofacitinib"
